# Supplementary material for: Ca’ Granda, Hortus simplicium: Restoring an Ancient Medicinal Garden of XV–XIX Century in Milan (Italy)
Source: MDPI journal article supplement (doi:10.3390/molecules26226933), 2021-11-17
Supplement: s1 [file s1]

# Ca' Granda, Hortus Simplicium: Restoring an Ancient Medicinal Garden of XV– XIX Century in Milan (Italy)

## Pharmacological survey.

Table S1. Results of the pharmacological survey in scientific literature.

| Species                     | Jar Inscript ion (Vase Number )     | Plant Parts Historica lly Used | Historic Source                        | Therapeutic Use Obtained from the Historic Source    | Bibliographic Reference                                               | Mechanism of Action                                                                                               | Biblio-graphic Reference   |
|-----------------------------|-------------------------------------|--------------------------------|----------------------------------------|------------------------------------------------------|-----------------------------------------------------------------------|-------------------------------------------------------------------------------------------------------------------|----------------------------|
| Acoraceae                   |                                     |                                |                                        |                                                      |                                                                       |                                                                                                                   |                            |
| <i>Acorus calamus</i> L.    | Electu-arium Diacur-cumae (14)      | Hypogeal parts                 | 14: [12]<br>19: [16]<br>45, 54,80: [9] | Anti-inflamma-tory                                   |                                                                       |                                                                                                                   |                            |
|                             | Electu-arium bened. lax. (19)       |                                |                                        | Depurative/ Lymphatic sys-tem/Kidney stones          | Anti-asthma, hypotensive, an-tiarrhythmic, hypocholester-olemic: [86] | Anti-inflam-matory: de-crease in the superoxide anion, total calcium lev-els, and myeloperoxi-dase (MPO) activity | Anti-in-flamma-tory: [83]  |
|                             | Tro-chiscus d. Cap-par. (45)        |                                |                                        | Diuretic                                             | Antidiarrhoeal: [85]                                                  |                                                                                                                   |                            |
|                             | Electu-arium d. Bac. laur. (54, 80) |                                |                                        | Gastrointestinal disorders (laxa-tive, carmina-tive) | Anti-inflamma-tory: [83,86]                                           | Kidney stones: diu-retic and nephroprotec-tive actions                                                            | Kidney stones: [84]        |
|                             |                                     |                                |                                        | Emmenagogue                                          | Kidney stones, diuretic: [84]                                         |                                                                                                                   |                            |
| Respiratory tract           |                                     |                                |                                        |                                                      |                                                                       |                                                                                                                   |                            |
| Thermogenic? Rubefacient?   |                                     |                                |                                        |                                                      |                                                                       |                                                                                                                   |                            |
| Adoxaceae                   |                                     |                                |                                        |                                                      |                                                                       |                                                                                                                   |                            |
| <i>Sambu-cus ebu-lus</i> L. | Un-guen-tum Agrip-pae (7)           | Hypogeal parts Flowers         | 7: [10,11]                             | Antibacterial (Tuberculosis)                         | Antibacterial: [254,255,257]                                          | Antibacterial: inhibits the production of δ-toxin by <i>Staphylococcus aureus</i> .                               | Antibacte-rial: [252,254]  |
| <i>Ebulo, dwarf el-der</i>  | Un-guen-tum ar-tanita (24)          |                                | 24: [20]                               | Anti-inflamma-tory                                   | Anti-inflamma-tory: [252,256,257]                                     | potent urease inhibitory ac-tivity                                                                                | Anti-in-flamma-tory: [252] |
|                             |                                     |                                |                                        | Circulatory sys-tem (circulation)                    | Antioxidant: [252,257]                                                |                                                                                                                   |                            |
|                             |                                     |                                |                                        |                                                      | Diuretic:                                                             |                                                                                                                   |                            |

|                                                                                                                           |                                                                                |                                 |                                      |                                                          |                                                                                                                                                                                             |                                                                                                                   |                                                        |
|---------------------------------------------------------------------------------------------------------------------------|--------------------------------------------------------------------------------|---------------------------------|--------------------------------------|----------------------------------------------------------|---------------------------------------------------------------------------------------------------------------------------------------------------------------------------------------------|-------------------------------------------------------------------------------------------------------------------|--------------------------------------------------------|
|                                                                                                                           |                                                                                |                                 | Depurative/<br>Lymphatic sys-<br>tem | [253]                                                    | of its flavo-<br>noids (specifi-<br>cally against<br><i>H. pylori</i> )                                                                                                                     |                                                                                                                   |                                                        |
|                                                                                                                           |                                                                                |                                 | Diuretic                             |                                                          | Anti-inflam-<br>matory: sup-<br>pression of<br>TNF- $\alpha$ , IL1- $\alpha$ ,<br>and IL1- $\beta$<br>production.<br>Interaction of<br>ursolic acid<br>interaction<br>with COX-2<br>pathway |                                                                                                                   |                                                        |
| Antipyretic                                                                                                               |                                                                                |                                 |                                      |                                                          |                                                                                                                                                                                             |                                                                                                                   |                                                        |
| <i>Sambu-<br/>cus<br/>nigra</i> L.                                                                                        | Electu-<br>arium<br>Di-<br>ascord.<br>(48)                                     |                                 | 48: [32]                             | Antibacterial                                            |                                                                                                                                                                                             | Antiviral ef-<br>fects:<br>Reduces he-<br>magglutina-<br>tion and in-<br>hibit the repli-<br>cation of hu-<br>man | Antiviral<br>effects<br>( <u>Fruit</u> ):<br>[260,261] |
|                                                                                                                           | Reb.<br>Sambuc.<br>(62)                                                        | <u>Leaves</u><br><u>Flowers</u> | 48: [33]                             | Diaphoretic                                              | Diaphoretic:<br>[259]                                                                                                                                                                       | influenza vi-<br>ruses.                                                                                           |                                                        |
|                                                                                                                           | <i>Sam-<br/>buco</i> ,<br><i>Euro-<br/>pean el-<br/>der</i>                    | Roab.<br>Sambuc.<br>(79)        | 62:<br>[38,286]                      | Liver/Spleen<br>disorders                                | Respiratory sys-<br>tem viral infec-<br>tions ( <u>Fruit</u> ):<br>[258,260,261]                                                                                                            | Decreases vi-<br>rus titer and<br>inhibits viral<br>protein syn-<br>thesis or virus<br>particle re-<br>lease.     |                                                        |
|                                                                                                                           |                                                                                |                                 | 79: [286]                            | Skin diseases<br>(erysipelas)                            | Soothing:<br>[251]                                                                                                                                                                          |                                                                                                                   |                                                        |
|                                                                                                                           |                                                                                | Aqua<br>Flor.<br>Samb.<br>(134) | 134: [75]                            | Respiratory tract<br>(mucus, expec-<br>torant, cold ecc) |                                                                                                                                                                                             |                                                                                                                   |                                                        |
| Soothing                                                                                                                  |                                                                                |                                 |                                      |                                                          |                                                                                                                                                                                             |                                                                                                                   |                                                        |
| Agaricaceae                                                                                                               |                                                                                |                                 |                                      |                                                          |                                                                                                                                                                                             |                                                                                                                   |                                                        |
| <i>Agari-<br/>cus<br/>bisporus</i><br>(J.E.<br>Lange)<br>Imbach<br>or<br><i>Agari-<br/>cus<br/>cam-<br/>pestris</i><br>L. | Tro-<br>chiscus<br>de<br>Agarici<br>(17)<br><br>Pilulae<br>Aloe.<br>lota. (23) | Epigeal<br>parts                | [10,11,14]                           | Expectorant<br><br>Gastritis, stom-<br>ach disorders     | Antibacterial,<br>antiviral, gastri-<br>tis, stomach dis-<br>orders, im-<br>munomodulant:<br>[91,92]<br><br>Anti-inflamma-<br>tory:<br>[91]                                                 | Gastritis,<br>stomach dis-<br>orders:<br>promotes di-<br>gestion.                                                 | Gastritis,<br>stomach<br>disorders:<br>[92]            |

|                                                                                                  |                                                      |                               |            |                                                                                                                |                                                                                                                                                                                                                                                                                           |                                                                                                                                                                                       |                                                |
|--------------------------------------------------------------------------------------------------|------------------------------------------------------|-------------------------------|------------|----------------------------------------------------------------------------------------------------------------|-------------------------------------------------------------------------------------------------------------------------------------------------------------------------------------------------------------------------------------------------------------------------------------------|---------------------------------------------------------------------------------------------------------------------------------------------------------------------------------------|------------------------------------------------|
| <i>Agarico, button mushroom, meadow mushroom</i>                                                 |                                                      |                               |            |                                                                                                                |                                                                                                                                                                                                                                                                                           |                                                                                                                                                                                       |                                                |
| <b>Anacardiaceae</b>                                                                             |                                                      |                               |            |                                                                                                                |                                                                                                                                                                                                                                                                                           |                                                                                                                                                                                       |                                                |
| <b><i>Pistacia lentiscus</i> L.</b><br><i>Lentisco, mastic tree</i>                              | Un-<br>guen-<br>tum<br>Agrip-<br>pae (7)             |                               |            | Circulatory sys-<br>tem (circulation)<br>Gangrene: mi-<br>crocircula-<br>tion/limbs circu-<br>latory disorders |                                                                                                                                                                                                                                                                                           |                                                                                                                                                                                       |                                                |
|                                                                                                  | Oleum<br>Mastyc<br>(31)                              |                               | 7: [10,11] |                                                                                                                | Anti-inflamma-<br>tory, Antioxi-<br>dant, Digestive:<br>[222]                                                                                                                                                                                                                             | Kidney<br>stones:<br>decreases cell<br>death induced<br>by COM (Cal-<br>cium oxalate<br>monohy-<br>drate), de-<br>creases E-cad-<br>herin and<br>H <sub>2</sub> O <sub>2</sub> levels |                                                |
|                                                                                                  | Em-<br>plastru<br>m crus-<br>tae<br>panis m.<br>(78) | <u>Exudate,</u><br><u>Gum</u> | 31: [24]   | Astringent<br><br>Expectorant,<br>Lung patholo-<br>gies, Tuberculo-<br>sis                                     |                                                                                                                                                                                                                                                                                           |                                                                                                                                                                                       | Kidney<br>stones<br>( <u>Fruit</u> ):<br>[223] |
|                                                                                                  |                                                      |                               | 78: [9]    |                                                                                                                | Kidney stones<br>( <u>Fruit</u> ):<br>[223]                                                                                                                                                                                                                                               |                                                                                                                                                                                       |                                                |
|                                                                                                  | Pilulae<br>Mas-<br>tacin.<br>(86)                    |                               | 86: [44]   | Digestive<br><br>Diuretic<br><br>Laxative                                                                      |                                                                                                                                                                                                                                                                                           |                                                                                                                                                                                       |                                                |
| <b><i>Pistacia terebinthus</i> L.</b><br><i>Terebin-<br/>tina, Cy-<br/>prus tur-<br/>pentine</i> |                                                      |                               |            | Antibacterial,<br>Disinfectant<br>(wounds)                                                                     |                                                                                                                                                                                                                                                                                           |                                                                                                                                                                                       |                                                |
|                                                                                                  |                                                      |                               |            | Anti-inflamma-<br>tory                                                                                         | Antimicrobial<br>( <i>Bacillus subtilis</i> ,<br><i>Salmonella typhi</i> ,<br><i>Escherichia coli</i> ,<br><i>Staphylococcus</i><br><i>epidermidis</i> ,<br><i>Pseudomonas ae-</i><br><i>ruginosa</i> , and <i>S.</i><br><i>dysenteriae</i> ), anti-<br>oxidant, antivi-<br>ral:<br>[222] |                                                                                                                                                                                       |                                                |
|                                                                                                  | Pilulae<br>de<br>Amon.<br>q. (81)                    | Resin                         | 81: [42]   | Depurative<br><br>Diuretic                                                                                     |                                                                                                                                                                                                                                                                                           |                                                                                                                                                                                       |                                                |
|                                                                                                  |                                                      |                               |            | Expectorant,<br>Respiratory tract                                                                              |                                                                                                                                                                                                                                                                                           |                                                                                                                                                                                       |                                                |
|                                                                                                  |                                                      |                               |            | Laxative<br><br>Mucolytic<br><br>Scabies, Parasiti-<br>cide                                                    |                                                                                                                                                                                                                                                                                           |                                                                                                                                                                                       |                                                |

| Apiaceae                                                                                |                                                          |                |                        |                                                                                                       |                                                                                                                                                                                                                                                                                   |              |                    |
|-----------------------------------------------------------------------------------------|----------------------------------------------------------|----------------|------------------------|-------------------------------------------------------------------------------------------------------|-----------------------------------------------------------------------------------------------------------------------------------------------------------------------------------------------------------------------------------------------------------------------------------|--------------|--------------------|
| <b><i>Anethum graveolens</i> L.</b><br><i>Aneto, dill</i>                               | Unguentum Pectorale (15)                                 | Fruit          | 15: [13]               | Airways                                                                                               | Analgesic, antimicrobial, anti-inflammatory: [102]                                                                                                                                                                                                                                |              |                    |
|                                                                                         |                                                          |                |                        | Antibacterial                                                                                         | Antibacterial: [103] - <i>Angelica</i> spp (i.e. <i>A. archangelica</i> L. and <i>A. sinensis</i> (Oliv.) Diels))                                                                                                                                                                 |              |                    |
| <b><i>Angelica</i> spp.</b><br><i>Angelica</i>                                          | Electuarium Diascord. (48)                               | Hypogeal parts | 48: [32, 33]           | Antipyretic<br>Diaphoretic<br>Expectorant/respiratory tract infections/pulmonary infections/antiviral | Anti-inflammatory: [103] - <i>Angelica</i> spp (i.e. <i>A. sinensis</i> (Oliv.) Diels)<br><br>Antioxidant: [103]- <i>Angelica</i> spp (i.e. <i>A. archangelica</i> L. and <i>A. sinensis</i> (Oliv.) Diels)<br><br>Bronchodilator: [103] - <i>A. glauca</i> Edgew (Epigeal parts) |              |                    |
| <b><i>Apium graveolens</i> L.</b><br><i>Sedano, celery</i>                              | Electuarium bened. lax. (19)                             | Seeds          | 19: [16]               | Laxative                                                                                              |                                                                                                                                                                                                                                                                                   |              |                    |
| <b><i>Athamanta turbith</i> (L.) Brot.</b><br><i>Atamanta di Mattioli, candy carrot</i> | Electuarium bened. lax. (19)<br>Unguentum Aratanita (24) | Hypogeal parts | 19: [16]<br>24: [20]   | Emetic<br>Emmenagogue<br>Laxative<br>Vermifuge/Anthelmintic/Antibacterial                             | Antimicrobial: [109]                                                                                                                                                                                                                                                              |              |                    |
| <b><i>Carum carvi</i> L.</b>                                                            | Electuarium                                              | Fruit          | 19: [16]<br>54,80: [9] | Diuretic<br>Emmenagogue                                                                               | Dyspepsia, diuretic: [119]                                                                                                                                                                                                                                                        | Emmenagogue: | Emmenagogue: [119] |

|                                                      |                                                                                               |                   |                  |  |                                                                                                                                                                |                                                    |                                                                                                                                                                                                                                   |                                       |
|------------------------------------------------------|-----------------------------------------------------------------------------------------------|-------------------|------------------|--|----------------------------------------------------------------------------------------------------------------------------------------------------------------|----------------------------------------------------|-----------------------------------------------------------------------------------------------------------------------------------------------------------------------------------------------------------------------------------|---------------------------------------|
| <i>Cumino dei prati, caraway</i>                     | bened. lax. (19)<br><br>Electu-<br>arium d.<br>Bac.<br>laur.<br>(54,80)                       |                   |                  |  | Gastrointestinal disorders (laxative, carminative)                                                                                                             | Emmenagogue, gastrointestinal disorders: [118,119] | increases the estrogen reduces the progesterone and FSH levels at proestrus phase<br><br>Presence of luteolin and apigenin (estrogenic isoflavonoids)<br><br>Gastrointestinal disorders: spasmolytic activity.                    | Gastrointestinal disorders: [118,119] |
| <i>Cuminum</i><br><i>cynimum</i> L.                  | Tro-<br>chiscus<br>de<br>Mirra<br>(51)<br><br>Electu-<br>arium d.<br>Bac.<br>laur.<br>(54,80) | Leaves<br>Fruit   | 51,54,80:<br>[9] |  | Diuretic<br><br>Emmenagogue, facilitates birth (Increases the contractions), Reduce menopausal flushing<br><br>Gastrointestinal disorders (carminative)        | Emmenagogue, gastrointestinal disorders: [118]     | Gastrointestinal disorders: increases acid secretion by a cholinergic mechanism. Increases amylase, protease, lipase, and phytase activities                                                                                      | Gastrointestinal disorders: [118]     |
| <i>Daucus carota</i> L.<br><br><i>Carota, carrot</i> | Electu-<br>arium<br>Diacur-<br>cumae<br>(9)                                                   | Hypogeal<br>parts | [12]             |  | Airways problems (non-specified)<br><br>Gastrointestinal disorders (non-specified)<br><br>Rubefacient, Circulatory problems (non-specified)<br><br>Thermogenic | Circulation: [154]                                 | Circulation: Antioxidant properties of phenolic compound minimise the risk of cardiovascular diseases Hypocholesterolemic, hypolipidemic, and hypotensive properties. Anti-platelet aggregatory characteristics of polyacetylenes | Circulation: [154]                    |

|                  |           |            |          |                                            |                                            |                                                      |
|------------------|-----------|------------|----------|--------------------------------------------|--------------------------------------------|------------------------------------------------------|
|                  |           |            |          |                                            | Antibacterial,<br>Disinfectant<br>(wounds) |                                                      |
|                  |           |            |          |                                            | Anti-inflamma-<br>tory                     |                                                      |
|                  |           |            |          |                                            | Antiviral                                  | Analgesic, Anti-<br>inflammatory,<br>neuroprotector: |
| <i>Dorema</i>    |           |            |          |                                            | Kidney stones                              | [157]                                                |
| <i>ammo-</i>     | Tro-      |            |          |                                            | Decongestant                               | Antibacterial:                                       |
| <i>niacum</i>    | chiscus   |            |          |                                            |                                            | [155,158]                                            |
| D. Don           | d. Cap-   |            | 45: [9]  | Depurative                                 |                                            |                                                      |
|                  | par. (45) | Gum        |          |                                            |                                            |                                                      |
| <i>Gomma</i>     | Pilulae   |            | 81: [42] | Dermatitis, Al-                            | Antiseptic (ul-                            |                                                      |
| <i>ammoni-</i>   | de        |            |          | lergies                                    | cers), kidney                              |                                                      |
| <i>aca, am-</i>  | Amon.     |            |          |                                            | stones, depura-                            |                                                      |
| <i>moni-</i>     | Q. (81)   |            |          | Diuretic                                   | tive, dermatitis,                          |                                                      |
| <i>acum</i>      |           |            |          |                                            | diuretic, laxative                         | [156]                                                |
| <i>gum</i>       |           |            |          | Emmenagogue                                |                                            |                                                      |
|                  |           |            |          | Expectorant,                               | Antiviral, respir-                         |                                                      |
|                  |           |            |          | Respiratory tract                          | atory system:                              | [158]                                                |
|                  |           |            |          | Laxative                                   |                                            |                                                      |
|                  |           |            |          | Scabies (Parasit-                          |                                            |                                                      |
|                  |           |            |          | icide)                                     |                                            |                                                      |
| <i>Eryn-</i>     |           |            |          | Circulatory sys-                           |                                            |                                                      |
| <i>gium</i>      | Un-       |            |          | tem (circulation)                          | Antioxidant (cir-                          |                                                      |
| <i>mariti-</i>   | guen-     | Hypogeal   | [10,11]  | Edema, extra-                              | culation):                                 |                                                      |
| <i>imum</i> L.   | tum       | parts      |          | vascular fluid                             | [161]                                      |                                                      |
| <i>Eringio</i>   | Agrip-    |            |          | accumulation                               |                                            |                                                      |
| <i>marit-</i>    | pae (7)   |            |          |                                            |                                            |                                                      |
| <i>timo, sea</i> |           |            |          | Diuretic                                   |                                            |                                                      |
| <i>holly</i>     |           |            |          |                                            |                                            |                                                      |
|                  |           |            |          | Antibacterial,<br>Disinfectant<br>(wounds) |                                            |                                                      |
| <i>Ferula</i>    |           |            |          | Anti-inflamma-                             | Antibacterial:                             |                                                      |
| <i>gum-</i>      | Pilulae   |            |          | tory                                       | [166]                                      |                                                      |
| <i>mosa</i>      | de        | <u>Gum</u> | 81: [42] | Decongestant                               | [168] - <u>Seeds</u>                       |                                                      |
| Boiss.           | Amon.     |            |          |                                            | <u>E.O.</u>                                |                                                      |
|                  | q. (81)   |            |          | Depurative                                 | Anti-inflamma-                             |                                                      |
| <i>Galbano,</i>  |           |            |          |                                            | tory:                                      |                                                      |
| <i>galba-</i>    |           |            |          | Dermatitis, Al-                            | [294]                                      |                                                      |
| <i>num</i>       |           |            |          | lergies                                    |                                            |                                                      |
|                  |           |            |          | Diuretic                                   |                                            |                                                      |

|                                          |                                |                      |             |                                   |                                        |                                                                            |                                                   |
|------------------------------------------|--------------------------------|----------------------|-------------|-----------------------------------|----------------------------------------|----------------------------------------------------------------------------|---------------------------------------------------|
|                                          |                                |                      |             | Expectorant,<br>Respiratory tract |                                        |                                                                            |                                                   |
|                                          |                                |                      |             | Laxative                          |                                        |                                                                            |                                                   |
|                                          |                                |                      |             | Scabies (Parasiticide)            |                                        |                                                                            |                                                   |
| <i>Ferula persica</i> Willd.             | Unguentum ar-tanita (24)       | Epigeal parts        | [20]        | Emetic                            |                                        |                                                                            |                                                   |
| <i>Sega-peno, sega-penum</i>             |                                |                      |             | Laxative                          |                                        |                                                                            |                                                   |
|                                          |                                |                      |             | Vermifuge                         |                                        |                                                                            |                                                   |
|                                          |                                |                      |             |                                   |                                        | Blood depurative:                                                          |                                                   |
|                                          |                                |                      |             |                                   |                                        | β-Myrcene, Limonene: Decreases AST, ALT, ALP, and bilirubina serum levels  |                                                   |
| <i>Foeniculum vul-gare</i> Mill.         | Electu-arium bened. lax. (19)  |                      | 19: [16]    | Blood depurative                  | Antimicrobial, blood depurative: [169] |                                                                            |                                                   |
| <i>Finocchio, fen-nel</i>                | Syrupus d. Duab. rad. (33)     | Hypogeal parts Fruit | 33: [25]    | Effects on Nervous System         |                                        | <i>Trans</i> -Anethole: antithrombotic.                                    | Blood depurative: [169]                           |
|                                          | Syrupus d. Artemisie q.p. (96) |                      | 96: [13,19] | Expectorant                       |                                        |                                                                            |                                                   |
|                                          |                                |                      |             | Laxative                          |                                        |                                                                            | 5-Methoxy-psoralen: inhibits cytochrome P450-3A4. |
|                                          |                                |                      |             |                                   |                                        | Essential oil: hypoglycemic                                                |                                                   |
| <i>Narthex asafetida</i> Falc. ex Lindl. | Pilulae Fetid. (46)            | Resin                | [31]        | Spasmolytic                       | Spasmolytic: [201,202]                 | Spasmolytic: azulene, ferulic acid, luteolin, umbelliferone, valeric acid. | Spasmolytic: [201,202]                            |
| <i>Sin: Ferula asafetida</i> H. Karst.   |                                |                      |             |                                   |                                        | Activity on muscarinic receptors (tested on tracheal smooth muscle)        |                                                   |

|                                                                  |                                             |                                       |                      |                                                                                             |  |                                                                                             |  |                                                                                                                                                                                                                                                        |       |
|------------------------------------------------------------------|---------------------------------------------|---------------------------------------|----------------------|---------------------------------------------------------------------------------------------|--|---------------------------------------------------------------------------------------------|--|--------------------------------------------------------------------------------------------------------------------------------------------------------------------------------------------------------------------------------------------------------|-------|
| <i>Finocchio<br/>Fetido,<br/>asafetida</i>                       |                                             |                                       |                      |                                                                                             |  |                                                                                             |  |                                                                                                                                                                                                                                                        |       |
|                                                                  |                                             |                                       |                      |                                                                                             |  |                                                                                             |  | Antioxidant:<br>dose depend-<br>ent inhibition<br>of<br>lipid peroxi-<br>dation, dose<br>dependently<br>hydroxyl rad-<br>ical<br>scavenging,<br>DPPH radical<br>scavenging;                                                                            |       |
| <i>Pe-<br/>troselin-<br/>um cris-<br/>pum</i><br>(Mill.)<br>Fuss | Syrupus<br>d. Duab.<br>rad. (33)            | Hypogeal<br>parts<br>Fruit<br>(Seeds) | 33: [25]<br>96: [13] | Blood depura-<br>tive<br><br>Expectorant                                                    |  | Antioxidant, di-<br>uretic:<br>[215]                                                        |  | Diuretic:<br>Significant in-<br>crease in<br>urine volume;<br>significant de-<br>crease in activ-<br>ity of kidney<br>cortex and<br>medulla Na <sup>+</sup> -<br>K <sup>+</sup> ATPase;<br>significant in-<br>crease in kid-<br>ney urine<br>flow rate | [215] |
| <i>Prezzem-<br/>olo, pars-<br/>ley</i>                           | Syrupus<br>d. Arte-<br>misie<br>q.p. (96)   |                                       | 96: [19]             | Effects on Nerv-<br>ous System                                                              |  |                                                                                             |  |                                                                                                                                                                                                                                                        |       |
|                                                                  |                                             |                                       |                      | Skin diseases:<br>Scabies and<br>Scall (Parasiti-<br>cide), Itch, and<br>irritations        |  |                                                                                             |  | Airways:<br>muscle relax-<br>ant of tracheal<br>chain                                                                                                                                                                                                  |       |
| <i>Pimpi-<br/>nella<br/>anisum</i><br>L.                         | Electu-<br>arium<br>Diacur-<br>cumae<br>(9) | Fruit                                 | 9: [12]<br>14: [9]   | Airways (non-<br>specified)<br><br>Gastrointestinal<br>disorders (non-<br>specified)        |  | Antimicrobial,<br>antioxidant, air-<br>ways, gastroin-<br>testinal disor-<br>ders:<br>[216] |  | Antiulcer:<br>significantly<br>inhibits gas-<br>tric mucosal<br>damage in-<br>duced by<br>necrotizing<br>agents and in-<br>domethacin.                                                                                                                 | [216] |
| Anice,<br>anise                                                  | Con-<br>serva<br>Hamech<br>(14)             |                                       |                      | Rubefacient,<br>Circulation<br><br>Scurvy<br><br>Syphilis (cutane-<br>ous symptoms<br>only) |  |                                                                                             |  | Laxative:<br>(with <i>Foenicu-<br/>lum vulgare</i> ,<br><i>Sambucus<br/>nigra</i> , and<br><i>Cassia</i> )                                                                                                                                             |       |



|                                                                            |                                           |                                                 |                          |                                                                                                                                              |                                                                                  |                                                                                                                                                                                                                                                                                                                                                                         |                               |
|----------------------------------------------------------------------------|-------------------------------------------|-------------------------------------------------|--------------------------|----------------------------------------------------------------------------------------------------------------------------------------------|----------------------------------------------------------------------------------|-------------------------------------------------------------------------------------------------------------------------------------------------------------------------------------------------------------------------------------------------------------------------------------------------------------------------------------------------------------------------|-------------------------------|
|                                                                            |                                           |                                                 |                          | Thermogenic                                                                                                                                  |                                                                                  | <i>augustifolia</i> )<br>decreases co-<br>lonic transit<br>time; in-<br>creases the<br>number of<br>daily evacua-<br>tions                                                                                                                                                                                                                                              |                               |
| <b><i>Pimpi-<br/>nella<br/>saxi-<br/>fraga</i> L.</b>                      | Aqua<br>Pimpi-<br>nell.<br>(136)          | Hypogeal<br>parts                               | 136:<br>[62,285,286<br>] | Antibacterial<br>(specifically oro-<br>pharyngeal cav-<br>ity)<br><br>Anti-inflamma-<br>tory<br><br>Antiviral<br><br>Expectorant             | Antibacterial:<br>[217]                                                          |                                                                                                                                                                                                                                                                                                                                                                         |                               |
| <i>Pimpi-<br/>nella sas-<br/>sifraga,<br/>burnet-<br/>saxifrag</i>         |                                           |                                                 |                          |                                                                                                                                              |                                                                                  |                                                                                                                                                                                                                                                                                                                                                                         |                               |
| <b>Aristolochiaceae</b>                                                    |                                           |                                                 |                          |                                                                                                                                              |                                                                                  |                                                                                                                                                                                                                                                                                                                                                                         |                               |
| <b><i>Aris-<br/>tolochia<br/>rutunda</i></b>                               |                                           |                                                 |                          | Anti-inflamma-<br>tory                                                                                                                       |                                                                                  |                                                                                                                                                                                                                                                                                                                                                                         |                               |
| L.                                                                         | Tro-<br>chiscus                           | Hypogeal                                        | 45: [9]                  | Kidney stones                                                                                                                                |                                                                                  |                                                                                                                                                                                                                                                                                                                                                                         |                               |
| <i>Aris-<br/>tolochia<br/>rotunda,<br/>round-<br/>leaved<br/>birthwort</i> | d. Cap-<br>par. (45)                      | parts                                           |                          | Diuretic<br><br>Emmenagogue                                                                                                                  |                                                                                  |                                                                                                                                                                                                                                                                                                                                                                         |                               |
|                                                                            |                                           |                                                 |                          |                                                                                                                                              |                                                                                  |                                                                                                                                                                                                                                                                                                                                                                         |                               |
| <b><i>Asarum<br/>euro-<br/>paeum</i></b>                                   | Tro-<br>chiscus<br>Absyn-<br>thi (11)     | <u>Hypogeal</u><br><u>parts</u><br><u>Seeds</u> | 11: [9]                  | Aperitive, diges-<br>tive<br><br>Anti-inflamma-<br>tory<br><br>Choleretic<br><br>Blood depura-<br>tive<br><br>Effects on Nerv-<br>ous System | Anti-Alzheimer:<br>[106]<br>Antitumoral:<br>[80] - <u>Aerial</u><br><u>parts</u> | Anti-Alz-<br>heimer: neu-<br>roprotectivity<br>against $\beta$ -ami-<br>loid plaques<br>caused neuro-<br>toxicity by in-<br>hibiting the<br>effects of NO<br>overproduc-<br>tion in the<br>hippocampus.<br><br>$\alpha$ -asarone:<br>positive ef-<br>fects on neu-<br>roinflammation,<br>onset of<br>clonic and/or<br>tonic seizures;<br>brain antioxi-<br>dant enzymes | Anti Alz-<br>heimer:<br>[106] |
| <i>Asaro,<br/>Euro-<br/>pean<br/>wild gin-<br/>ger</i>                     | Syrupus<br>d. Arte-<br>misie<br>q.p. (96) |                                                 | 96: [13,19]              |                                                                                                                                              |                                                                                  |                                                                                                                                                                                                                                                                                                                                                                         |                               |

|                                                                                 |                                                      |                                       |                        |                                                                                                                            |                                                                                    |  |                                                                                                                                                |                                 |
|---------------------------------------------------------------------------------|------------------------------------------------------|---------------------------------------|------------------------|----------------------------------------------------------------------------------------------------------------------------|------------------------------------------------------------------------------------|--|------------------------------------------------------------------------------------------------------------------------------------------------|---------------------------------|
|                                                                                 |                                                      |                                       |                        |                                                                                                                            |                                                                                    |  | β-asarone:<br>neuroprotec-<br>tive action;<br>positive ef-<br>fects on<br>memory and<br>learning; im-<br>proves brain<br>microcircula-<br>tion |                                 |
| <b>Asparagaceae</b>                                                             |                                                      |                                       |                        |                                                                                                                            |                                                                                    |  |                                                                                                                                                |                                 |
| <i>Aspara-<br/>gus of-<br/>ficinalis</i><br>L.<br>Aspar-<br>ago, as-<br>paragus | Electu-<br>arium<br>bened.<br>lax. (19)              | Pulp<br>from the<br>female<br>plant   | 19: [16]               | Laxative                                                                                                                   | Laxative:<br>[107]                                                                 |  | Laxative:<br>aerial parts fa-<br>cilitate evacu-<br>ation increas-<br>ing fecal bulk<br>with undi-<br>gested fiber                             | Laxative:<br>[107]              |
| <i>Drimia<br/>mari-<br/>tima</i><br>(L.)<br>Stearn                              | Un-<br>guen-<br>tum<br>Agrip-<br>pae (7)             | Hypogeal<br>parts<br>Epigeal<br>parts | 7: [10,11]<br>27: [22] | Circulatory sys-<br>tem (circulation)<br><br>Edema, extra-<br>vascular fluid<br>accumulation<br><br>Diuretic<br><br>Emetic | Antimicrobial,<br>Antioxidant, an-<br>titumoral, circu-<br>latory system:<br>[159] |  | Circulatory<br>system:<br>Scillonin: digi-<br>tal-like effects                                                                                 | Circulatory<br>system:<br>[159] |
| <i>Cipolla<br/>di mare,<br/>sea squill</i>                                      | Oxymel<br>Scyll.<br>(27)                             |                                       |                        | Expectorant                                                                                                                |                                                                                    |  |                                                                                                                                                |                                 |
| <i>Ruscus<br/>acule-<br/>atus</i> L.<br>Rusco,<br>butch-<br>er's<br>broom       | Electu-<br>arium<br>bened.<br>lax. (19)              | <u>Seeds,</u><br><u>Pulp</u>          | 19: [16]               | Laxative                                                                                                                   | Spasmolytic:<br>[235] - <u>Aerial</u><br><u>parts</u>                              |  |                                                                                                                                                |                                 |
| <b>Aspleniaceae</b>                                                             |                                                      |                                       |                        |                                                                                                                            |                                                                                    |  |                                                                                                                                                |                                 |
| <i>Asple-<br/>nium<br/>scolo-<br/>pen-<br/>drium</i> L.                         | Forse<br>Electu-<br>arium<br>Diacur-<br>cumae<br>(9) | Leaves                                | 9: [12]<br>45: [9]     | Anti-inflamma-<br>tory<br><br>Kidney stones<br><br>Diuretic                                                                | Antioxidant:<br>[108]                                                              |  |                                                                                                                                                |                                 |
| <i>Scolpen-<br/>dra co-<br/>mune,<br/>hart's</i>                                | Tro-<br>chiscus<br>d. Cap-<br>par. (45)              |                                       |                        | Emmenagogue<br><br>Airways (non-<br>specified)                                                                             |                                                                                    |  |                                                                                                                                                |                                 |

|                                    |                                     |                                        |          |  |                                              |                                                                                 |                                                    |                                                       |
|------------------------------------|-------------------------------------|----------------------------------------|----------|--|----------------------------------------------|---------------------------------------------------------------------------------|----------------------------------------------------|-------------------------------------------------------|
| <i>tongue fern</i>                 |                                     |                                        |          |  | Gastrointestinal disorders (non-specified)   |                                                                                 |                                                    |                                                       |
|                                    |                                     |                                        |          |  | Rubefacient, Circulation                     |                                                                                 |                                                    |                                                       |
|                                    |                                     |                                        |          |  | Thermogenic                                  |                                                                                 |                                                    |                                                       |
| <i>Ceterach officinarum</i> Willd. | Forse Electu-arium Diacur-cumae (9) | Leaves                                 | [12]     |  | Airways (non-specified)                      |                                                                                 |                                                    |                                                       |
| <i>Cedracca , rustyback</i>        |                                     |                                        |          |  | Gastrointestinal disorders (non-specified)   | Antioxidant: [127,128]                                                          |                                                    |                                                       |
|                                    |                                     |                                        |          |  | Rubefacient, Circulation                     |                                                                                 |                                                    |                                                       |
|                                    |                                     |                                        |          |  | Thermogenic                                  |                                                                                 |                                                    |                                                       |
| <b>Boraginaceae</b>                |                                     |                                        |          |  |                                              |                                                                                 |                                                    |                                                       |
| Analgesic                          |                                     |                                        |          |  |                                              |                                                                                 |                                                    |                                                       |
| Anti-depressant                    |                                     |                                        |          |  |                                              |                                                                                 |                                                    |                                                       |
| Antipyretic                        |                                     |                                        |          |  |                                              |                                                                                 |                                                    |                                                       |
| Kidney stones                      |                                     |                                        |          |  |                                              |                                                                                 |                                                    |                                                       |
| <i>Anchusa officinalis</i> L.      | Aqua Buglos. (144)                  | Aerial parts                           | [27]     |  | Diuretic                                     |                                                                                 |                                                    |                                                       |
| <i>Buglossa, common bugloss</i>    |                                     |                                        |          |  | Circulatory system                           | Anti-diabetic (specifically circulation), anti-inflammatory, antioxidant: [101] | Anti-inflammatory: inhibits LOX and HYA            | [101]                                                 |
|                                    |                                     |                                        |          |  | Emmenagogue                                  |                                                                                 |                                                    |                                                       |
|                                    |                                     |                                        |          |  | Facilitate birth (Increase the contractions) |                                                                                 |                                                    |                                                       |
|                                    |                                     |                                        |          |  | Skin diseases: erysipelas                    |                                                                                 |                                                    |                                                       |
| Tonic                              |                                     |                                        |          |  |                                              |                                                                                 |                                                    |                                                       |
| <i>Borago officinalis</i> L.       | Con-serva Bo-ragina. (21)           | <u>Epigeal parts</u><br><u>Flowers</u> | 21: [17] |  | Anti-depressant                              | Anti-asthma: [112,113] - <u>Leaves</u>                                          | Anti-asthma: Ca <sup>2+</sup> antagonist activity. | Anti-asthma, spas-molytic, cir-culatory system: [112] |
| <i>Borragine, common borage</i>    |                                     |                                        | 21: [18] |  | Circulatory system                           | Anti-inflamma-tory: [111] - <u>Seeds</u>                                        | Spasmolytic: Ca <sup>2+</sup> antagonist activity. |                                                       |
|                                    |                                     |                                        | 143: [9] |  | Respiratory system                           |                                                                                 |                                                    |                                                       |

|                                           |                          |                     |                     |                     |                                                                                  |                                                                                                                                                                                              |                          |
|-------------------------------------------|--------------------------|---------------------|---------------------|---------------------|----------------------------------------------------------------------------------|----------------------------------------------------------------------------------------------------------------------------------------------------------------------------------------------|--------------------------|
|                                           | Aqua Pulmon. (143)       |                     |                     | Tonic               | Antioxidant: [110]                                                               | Circulatory system: Ca <sup>2+</sup> antagonist activity.                                                                                                                                    | Anti-inflammatory: [111] |
|                                           |                          |                     |                     |                     | Circulatory system: [110, 112] - <u>Leaves</u>                                   | Anti-inflammatory: suppresses TNF- $\alpha$ and PGE2 production.                                                                                                                             |                          |
| <i>Cynoglossum officinale</i> L.          | Pilulae de Cynoglo. (69) | Hypogeal parts      | [9,285,286]         | Astringent for gums | Analgesic, antibacterial, anti-hemorrhagic, anti-inflammatory, antiseptic: [152] |                                                                                                                                                                                              |                          |
| <i>Cynoglossa</i> , hound's tongue        |                          |                     |                     | Expectorant         |                                                                                  |                                                                                                                                                                                              |                          |
|                                           |                          |                     |                     | Sedative-hypnotic   |                                                                                  |                                                                                                                                                                                              |                          |
| <i>Pulmonaria officinalis</i> L.          | Aqua Pulmon. (143)       | Buds                | [9]                 | Circulatory system  | Antioxidant: [234]                                                               | Antioxidant: polyphenols, flavones, and proanthocyanidins have antioxidant and antiradical activity.                                                                                         | Antioxidant: [234]       |
| <i>Polmonaria</i> , Jerusalem-sage        |                          |                     |                     |                     |                                                                                  |                                                                                                                                                                                              |                          |
| <i>Symphytum officinale</i> L.            | Aqua Pulmon. (143)       | Hypogeal parts      | [9]                 | Circulatory system  | Anti-inflammatory: [269]                                                         | Anti-inflammatory: impairs the interleukin-1 (IL-1) induced expression of pro-inflammatory markers including E-selectin, VCAM1, ICAM1, and COX-2. Inhibits the activation of NF- $\kappa$ B. | Anti-inflammatory: [269] |
| <i>Consolida magiore</i> , common comfrey |                          |                     |                     |                     |                                                                                  |                                                                                                                                                                                              |                          |
| <b>Burseraceae</b>                        |                          |                     |                     |                     |                                                                                  |                                                                                                                                                                                              |                          |
| <i>Boswellia serrata</i>                  | Unguentum Citrini (44)   | Gum-resin ot-tenuta | 44: [30]<br>69: [9] | Astringent for gums | Antibacterial, antifungal, Anti-inflammatory,                                    |                                                                                                                                                                                              |                          |
|                                           |                          |                     |                     | Expectorant         |                                                                                  |                                                                                                                                                                                              |                          |

|                                   |                             |                           |               |                                                                         |                                                                                                                                                                                                          |                                            |
|-----------------------------------|-----------------------------|---------------------------|---------------|-------------------------------------------------------------------------|----------------------------------------------------------------------------------------------------------------------------------------------------------------------------------------------------------|--------------------------------------------|
| Roxb. ex Colebr.                  | Pilulae de Cinglo. (69)     | dall'incisione del tronco |               | Skin blemishes (scars, freckles, irritations)                           | Antioxidant, Sedative: [114]                                                                                                                                                                             |                                            |
| Boswellia, Indian olibanum tree   |                             |                           |               | Sedative-hypnotic                                                       | Antimicrobial, wounds: [116]                                                                                                                                                                             |                                            |
|                                   |                             |                           |               |                                                                         | Asthma: [295]                                                                                                                                                                                            |                                            |
| Commiphora gileadensis (L.) C.Ch. | Electuarium Diacurcumae (9) | Fruit, balsamo            | 9: [12]       | Airways (non-specified)<br>Gastrointestinal disorders (non specificati) | Antibacterial: [139]                                                                                                                                                                                     |                                            |
| Balsamo arabo, Balsam of Gilead   |                             |                           |               | Thermogenic                                                             |                                                                                                                                                                                                          |                                            |
|                                   | Electuarium Diacurcumae (9) |                           |               | Antibacterial, Disinfectant (wounds)                                    | Antioxidant: scavenging activity on free radicals.                                                                                                                                                       |                                            |
|                                   |                             |                           |               | Anti-inflammatory                                                       |                                                                                                                                                                                                          |                                            |
|                                   |                             |                           |               | Astringent for gums                                                     | Antibacterial, antifungal, anti-inflammatory, antiseptic (wounds), digestive (dyspepsia and gastritis), emmenagogue, stimulant of the uterus (abortive), gingivitis, respiratory system disorders: [140] |                                            |
| Commiphora myrrha (Nees) Engl.    | Unguentum aratanita (24)    |                           | 9: [12]       | Depurative                                                              |                                                                                                                                                                                                          |                                            |
|                                   |                             |                           | 24: [20]      | Emmenagogue                                                             |                                                                                                                                                                                                          | Antioxidant: [142]                         |
|                                   |                             |                           | 51: [285,286] | Expectorant                                                             |                                                                                                                                                                                                          |                                            |
|                                   | Trochiscus de               | Gum, Gum-resin            | 51, 69: [9]   | Facilitate birth (Increase the contractions)                            |                                                                                                                                                                                                          | Anti-inflammatory and antihistamine: [141] |
| Mirra, Myrrh                      | Mirra (51)                  |                           | 81: [42]      |                                                                         |                                                                                                                                                                                                          |                                            |
|                                   | Pilulae de Cinglo. (69)     |                           |               | Sedative-hypnotic                                                       | Antioxidant: [142]                                                                                                                                                                                       |                                            |
|                                   |                             |                           |               | Airways (non-specified), antihistamine                                  | Antihistamine, gingivitis: [141]                                                                                                                                                                         |                                            |
|                                   | Pilulae de Amon. q. (81)    |                           |               | Gastrointestinal disorders (Stomach depurative, laxative)               |                                                                                                                                                                                                          |                                            |

|                                                                                                            |                                             |                                                                          |                          |                                                   |                                                               |
|------------------------------------------------------------------------------------------------------------|---------------------------------------------|--------------------------------------------------------------------------|--------------------------|---------------------------------------------------|---------------------------------------------------------------|
|                                                                                                            |                                             |                                                                          |                          | Menopausal flushing                               | suppress MAPK and NF-κB activation.                           |
|                                                                                                            |                                             |                                                                          |                          | Scabies (Parasiticide)                            | Inhibits histamine release in activated HMC-1 cells.          |
|                                                                                                            |                                             |                                                                          |                          | Thermogenic                                       |                                                               |
|                                                                                                            |                                             |                                                                          |                          | Vermifuge                                         |                                                               |
| <b>Capparaceae</b>                                                                                         |                                             |                                                                          |                          |                                                   |                                                               |
|                                                                                                            |                                             |                                                                          |                          | Antibacterial (Tuberculosis)                      | Antimicrobial, anti-inflammatory, hypocholesterolemic         |
|                                                                                                            |                                             |                                                                          |                          | Anti-inflammatory                                 | (Fruit): [122]                                                |
| <i>Cap-<br/>paris<br/>spinosa</i><br>L.                                                                    | Un-<br>guen-<br>tum ar-<br>tanita<br>(24)   | <u>Hypogeal<br/>parts,<br/>scorza<br/>della Hy-<br/>pogeal<br/>parts</u> | 24: [20]<br>45, 112: [9] | Depurative                                        |                                                               |
| <i>Cappero,<br/>caper<br/>bush</i>                                                                         | Tro-<br>chiscus<br>d. Cap-<br>par. (45)     |                                                                          | 112:<br>[285,286]        | Diuretic                                          | Hepatoprotector:<br>[121,122] - <u>Aer-<br/>ial parts</u>     |
|                                                                                                            | Oleum<br>de. ca-<br>parb. s.<br>(112)       |                                                                          | 120: [59]                | Emmenagogue                                       |                                                               |
|                                                                                                            |                                             |                                                                          |                          | Liver (hepato-<br>protector etc.)                 | Hypoglycemic,<br>hypolipidemic:<br>[120] - Fruit              |
|                                                                                                            | Aqua<br>Flor. Ca<br>(120)                   |                                                                          |                          | Stomach-ache<br>(Spasmolytic)                     |                                                               |
| <b>Caprifoliaceae</b>                                                                                      |                                             |                                                                          |                          |                                                   |                                                               |
| <i>Knautia<br/>arvensis</i><br>(L.)<br>Coul.                                                               | Aqua<br>Scabi-<br>ose.<br>(129,<br>141)     | Epigeal<br>parts                                                         | 129, 141:<br>[9,285,286] | Antipyretic                                       |                                                               |
| <i>Scabiosa,<br/>field sca-<br/>bious</i>                                                                  |                                             |                                                                          |                          |                                                   |                                                               |
| <i>Valeri-<br/>ana</i> spp                                                                                 |                                             |                                                                          |                          | Airways (non-<br>specified)                       |                                                               |
| <i>Valeri-<br/>ana cel-<br/>tica, Va-<br/>leriana<br/>selvatica,<br/>Alpine<br/>valerian,<br/>Valerian</i> | Electu-<br>arium<br>Diacur-<br>cumae<br>(9) | Hypogeal<br>parts                                                        | [12]                     | Gastrointestinal<br>disorders (non-<br>specified) | Gastrointestinal<br>disorders: [273]                          |
|                                                                                                            |                                             |                                                                          |                          | Thermogenic                                       | Antidiar-<br>rheal effects:<br>block of cal-<br>cium channels |
|                                                                                                            |                                             |                                                                          |                          |                                                   | Antidiar-<br>rheal ef-<br>fects:<br>[273]                     |
| <b>Caryophyllaceae</b>                                                                                     |                                             |                                                                          |                          |                                                   |                                                               |

|                                             |                                            |                             |                                               |                                                                                                                                                                                                                          |                                                     |                                                                                                                                                                                                                                  |
|---------------------------------------------|--------------------------------------------|-----------------------------|-----------------------------------------------|--------------------------------------------------------------------------------------------------------------------------------------------------------------------------------------------------------------------------|-----------------------------------------------------|----------------------------------------------------------------------------------------------------------------------------------------------------------------------------------------------------------------------------------|
| <i>Dianthus caryophyllus</i><br>L.          | Electu-<br>arium<br>bened.<br>lax. (19)    | Flowers                     | [16]                                          | Laxative                                                                                                                                                                                                                 |                                                     |                                                                                                                                                                                                                                  |
| <i>Garofano comune, carnation</i>           |                                            |                             |                                               |                                                                                                                                                                                                                          |                                                     |                                                                                                                                                                                                                                  |
| <i>Saponaria officinalis</i><br>L.          | Aqua<br>Sa-<br>ponar.<br>(126)             | Hypogeal<br>parts<br>Leaves | [70]                                          | Aperitive, diges-<br>tive<br><br>Anti-inflamma-<br>tory<br><br>Antiviral<br><br>Depurative<br><br>Myorelaxant<br><br>Venereal dis-<br>eases and Syphi-<br>lis (cutaneous<br>and musculo-<br>skeletal symp-<br>toms only) | Antiviral: [265]                                    | Antiviral:<br>[265]                                                                                                                                                                                                              |
| <i>Saponaria, com-<br/>mon<br/>soapwort</i> |                                            |                             |                                               |                                                                                                                                                                                                                          |                                                     |                                                                                                                                                                                                                                  |
| <b>Compositae</b>                           |                                            |                             |                                               |                                                                                                                                                                                                                          |                                                     |                                                                                                                                                                                                                                  |
| <i>Achillea mille-<br/>folium</i><br>L.     | Electu-<br>arium<br>bened.<br>lax. (19)    |                             | 19: [16]                                      | Antibacterial<br><br>Anti-inflamma-<br>tory<br><br>Antipyretic<br><br>Kidney stones                                                                                                                                      |                                                     | Emmena-<br>gogue:<br>estrogenic ac-<br>tivity of apig-<br>enin and lute-<br>olin.                                                                                                                                                |
| <i>Mille-<br/>foglio, common<br/>Yarrow</i> | Electu-<br>arium<br>Di-<br>ascord.<br>(48) | Aerial<br>parts<br>Seeds    | 19, 48: [32]<br><br>48: [33]<br><br>137: [62] | Diaphoretic<br><br>Digestive<br><br>Disinfectant<br>(wounds)<br><br>Diuretic<br><br>Effects on auto-<br>nomic nervous<br>system (vagus)                                                                                  | Antibacterial,<br>Antiulcer, Em-<br>menagogue: [82] | Antiulcer:<br>protects the<br>gastric mu-<br>cosa against<br>acute gastric<br>lesions and<br>promotes re-<br>generation of<br>the gastric<br>mucosa. In-<br>hibits gastric<br>secretion or<br>increases pro-<br>tective factors. |

|                                                                   |                                             |                                                            |             |                                                                                        |                                                                                                                                                                                                                                   |                                                                                                                                                                                                                           |
|-------------------------------------------------------------------|---------------------------------------------|------------------------------------------------------------|-------------|----------------------------------------------------------------------------------------|-----------------------------------------------------------------------------------------------------------------------------------------------------------------------------------------------------------------------------------|---------------------------------------------------------------------------------------------------------------------------------------------------------------------------------------------------------------------------|
|                                                                   |                                             |                                                            |             | Emmenagogue                                                                            |                                                                                                                                                                                                                                   |                                                                                                                                                                                                                           |
|                                                                   |                                             |                                                            |             | Hemorrhoids                                                                            |                                                                                                                                                                                                                                   |                                                                                                                                                                                                                           |
|                                                                   |                                             |                                                            |             | Expectorant                                                                            |                                                                                                                                                                                                                                   |                                                                                                                                                                                                                           |
|                                                                   |                                             |                                                            |             | Laxative                                                                               |                                                                                                                                                                                                                                   |                                                                                                                                                                                                                           |
| <i>Artemisia ab-sinthium</i> L.<br><br><i>Assenzio, worm-wood</i> | Electu-<br>arium<br>Diacur-<br>cumae<br>(9) | Leaves<br>Flower-<br>ing aerial<br>parts<br>Fruit<br>Seeds | 9: [12]     | Airways (non-<br>specified)                                                            | Antibacterial,<br>anthelmintic,<br>antifungal, anti-<br>protozoal, anti-<br>viral, antioxi-<br>dant, anti-in-<br>flammatory, an-<br>tipyretic, anal-<br>gesic, antiulcer,<br>immunomodu-<br>latory effects,<br>jaundice:<br>[104] | Anthelmintic:<br>$\alpha$ - and $\beta$ -thu-<br>jone: decrease<br>juvenile larval<br>motility and<br>egg<br>development<br>of <i>Ascaris<br/>suum</i>                                                                    |
|                                                                   | Tro-<br>chiscus<br>Absyn-<br>thi (11)       |                                                            |             | Anti acidic                                                                            |                                                                                                                                                                                                                                   |                                                                                                                                                                                                                           |
|                                                                   | Con-<br>serva<br>Hamech<br>(14)             |                                                            | 11, 14: [9] | Anticonvulsant                                                                         |                                                                                                                                                                                                                                   |                                                                                                                                                                                                                           |
|                                                                   | Oleum<br>Ab-<br>sinthÿ<br>(34)              |                                                            | 34: [26]    | Antiemetic                                                                             |                                                                                                                                                                                                                                   |                                                                                                                                                                                                                           |
|                                                                   | Con-<br>serva<br>Absinth.<br>(64)           |                                                            | 64: [39,40] | Anti-inflamma-<br>tory                                                                 |                                                                                                                                                                                                                                   | Antibacterial:<br>Essential oil:<br>suppresses bio-<br>synthesis of<br>proteins,<br>RNA, DNA,<br>and polysac-<br>charides in<br>bacterial<br>walls.                                                                       |
|                                                                   | Syrupus<br>Absyn-<br>thii (92)              |                                                            | 92: [45,46] | Antipyretic                                                                            |                                                                                                                                                                                                                                   |                                                                                                                                                                                                                           |
|                                                                   |                                             |                                                            |             | Aperitive, diges-<br>tive                                                              |                                                                                                                                                                                                                                   |                                                                                                                                                                                                                           |
|                                                                   |                                             |                                                            |             | Choleretic                                                                             |                                                                                                                                                                                                                                   |                                                                                                                                                                                                                           |
|                                                                   |                                             |                                                            |             | Diuretic                                                                               |                                                                                                                                                                                                                                   |                                                                                                                                                                                                                           |
|                                                                   |                                             |                                                            |             | Gastrointestinal<br>disorders (acidic<br>reflux)                                       |                                                                                                                                                                                                                                   |                                                                                                                                                                                                                           |
|                                                                   |                                             |                                                            |             | Jaundice                                                                               |                                                                                                                                                                                                                                   | Anti-inflam-<br>matory:<br>5,6,3',5'-tetra-<br>methoxy 7,4'-<br>hydroxyfla-<br>vone, car-<br>domonin,<br>caruifolin D:<br>suppression<br>of pro-inflam-<br>matory medi-<br>ators (iNOS,<br>PGE, NO,<br>COX-2, NF-<br>kB). |
|                                                                   |                                             |                                                            |             | Kidney stones                                                                          |                                                                                                                                                                                                                                   |                                                                                                                                                                                                                           |
|                                                                   |                                             |                                                            |             | Parasiticide<br>(parasitosis that<br>causes intermit-<br>tent fever, i.e.,<br>malaria) |                                                                                                                                                                                                                                   |                                                                                                                                                                                                                           |
|                                                                   |                                             |                                                            |             | Rubefacient,<br>Circulation                                                            |                                                                                                                                                                                                                                   |                                                                                                                                                                                                                           |
|                                                                   |                                             |                                                            |             | Scurvy                                                                                 |                                                                                                                                                                                                                                   | Antioxidant:<br>Phenolic com-<br>pounds and<br>flavonoids:<br>free radical<br>scavengers                                                                                                                                  |
|                                                                   |                                             |                                                            |             | Skin diseases:<br>Scabies (Parasit-<br>icide), Scall, Itch,<br>and irritations         |                                                                                                                                                                                                                                   |                                                                                                                                                                                                                           |



|                                    |                                                                                                                                                                                         |
|------------------------------------|-----------------------------------------------------------------------------------------------------------------------------------------------------------------------------------------|
| Syphilis (cutaneous symptoms only) | Reduction of lipid peroxidation, decreasing of TBARS level, and recovery of endogenous antioxidant (SOD, GSH).                                                                          |
| Thermogenic                        | Antipyretic and analgesic: 22-dien-3 Bat, 24- $\beta$ -ethyl p-cholesta-7: nicotinic and muscarinic action.                                                                             |
| Vermifuge                          | Antiprotozoal: Essential oil, flavonoids, artemisin: stimulate both heme and mitochondrial-mediated degradation cascade; inhibit PfATP6, LDH, SAMS, PyrK, SpdSyn, OAT enzyme activities |
|                                    | Antiviral: inhibits the HIV-1 integrase enzyme from connecting the host cell DNA with the reversibly transcribed viral DNA                                                              |
|                                    | Digestive: Bitter substances, essential oils:                                                                                                                                           |

|                                     |                                |                        |                              |                                                                             |                                                            |                                                                                                                                                                      |
|-------------------------------------|--------------------------------|------------------------|------------------------------|-----------------------------------------------------------------------------|------------------------------------------------------------|----------------------------------------------------------------------------------------------------------------------------------------------------------------------|
|                                     |                                |                        |                              |                                                                             |                                                            | enhance bile production and secretion.                                                                                                                               |
|                                     |                                |                        |                              |                                                                             |                                                            | Immunomodulatory effects: Polysaccharides: initiate Th1 response and activate NO synthesis.                                                                          |
|                                     |                                |                        |                              |                                                                             |                                                            | Jaundice, hepatitis: hepatoprotective activity, liver microsomal drug-metabolizing enzymes suppression, free radical scavenging activity, calcium channels blockage. |
|                                     | Syrupus d. Artemisie q.p. (96) |                        |                              | Aperitive, Digestive                                                        |                                                            | Hepatoprotector: decreases $\alpha$ -FP, $\gamma$ -GT, 5'-NT, ALT, AST, LD, and G6PD levels; decreases total bilirubin levels; increases albumin levels.             |
| <i>Artemisia spp</i>                | Aqua Puv. arte. (128)          | <u>Aerial parts</u>    | 96: [13,19]<br>128, 131: [9] | Depurative (del sangue)<br>Effects on Nervous System<br>Menopausal flushing | Hepatoprotector: [105] - <u>Leaves</u>                     | Hepatoprotector: [105]                                                                                                                                               |
|                                     | Aqua Artemis. (131)            |                        |                              | Vermifuge                                                                   |                                                            |                                                                                                                                                                      |
| <i>Centaurea benedicta</i> (L.) L.  | Electuarium Diascord. (48)     | Flowering aerial parts | 48: [32,33]                  | Antibacterial<br>Antipyretic<br>Antiviral                                   | Anti-schistosomiasis (fever as one of the symptoms): [126] |                                                                                                                                                                      |
| <i>Cardo santo, blessed thistle</i> | Aqua Card. bend. (139)         |                        | 139: [78]                    | Diaphoretic<br>Disinfectant (wounds)                                        | Wounds and ulcers: [125]                                   |                                                                                                                                                                      |

| Respiratory system diseases                                                                            |                                                      |                          |                           |                                                                                                                                   |                                                                                              |                                                                                                                                                                  |                              |
|--------------------------------------------------------------------------------------------------------|------------------------------------------------------|--------------------------|---------------------------|-----------------------------------------------------------------------------------------------------------------------------------|----------------------------------------------------------------------------------------------|------------------------------------------------------------------------------------------------------------------------------------------------------------------|------------------------------|
| <b><i>Cichorium endivia</i></b> L.<br><i>Endivia, endive</i>                                           | Diatrium. santal. (50)                               | <u>Epigeal parts</u>     | [9]                       | Anti-inflammatory<br><br>Depurative<br><br>Tonic                                                                                  | Antioxidant: [130]- <u>Hypogeal parts</u><br><br>Hepatoprotector: [129]                      |                                                                                                                                                                  |                              |
| <b><i>Cichorium intybus</i></b> L.<br><i>Cicoria, cichory</i>                                          | Syrupus Cichor. Com. Reub. Gul. -n. (94, 107)        | Hypogeal parts           | 94, 107: [47,48,285, 286] |                                                                                                                                   |                                                                                              |                                                                                                                                                                  |                              |
| <b><i>Eupatorium cannabinum</i></b> L.<br><i>Canapa acquatica, hemp-agrimony</i>                       | Electuarium Diacurcumae (9)                          | Flowering aerial parts   | [12]                      | Airways (non-specified)<br><br>Gastrointestinal disorders (acidic reflux)<br><br>Thermogenic                                      | Anti-inflammatory: [162]<br><br>Choleretic, Hepatoprotector: [163]                           | Anti-inflammatory: suppresses fMet-Leu-Phe/cytochalasin B (fMLP/CB)-induced superoxide anion generation and elastase release                                     | Anti-inflammatory: [162]     |
| <b><i>Matricaria chamomilla</i></b> L.<br><i>Chamomilla, chamomile</i>                                 | Unguentum ar-tanita (24)<br><br>Aqua Matricar. (122) | Flowering aerial parts   | 24: [20] 122: [61,62]     | Stomach depurative<br><br><b>Laxative</b><br><br>Spasmolytic<br><br>Vermifuge                                                     | <b>Antidiarrhoeal:</b> [79]<br><br>Antiulcer, gastrointestinal disorders, spasmolytic: [190] |                                                                                                                                                                  |                              |
| <b><i>Petasites hybridus</i></b> (L.)<br>G.Gaertn., B.Mey. & Scherb.<br><br><i>Petasite, butterbur</i> | Aqua Petasit. (133)                                  | Hypogeal parts<br>Leaves | [72]                      | Antipyretic<br><br>Antiviral<br><br>Aperitive, digestive<br><br>Diaphoretic<br><br>Diuretic<br><br>Emmenagogue<br><br>Expectorant | Antiulcer, expectorant: [214]                                                                | Antiulcer: inhibition of lipoxygenase activity and leukotriene biosynthesis<br><br>Expectorant: Petasin: antispasmodic properties. Improves lung ventilation and | Antiulcer, expectorant [214] |

|                                                                         |                                            |                                      |                             |                                                                                                                |                                                                                                                       |                                                                                                                                                                                                                                                                                                     |                                                         |
|-------------------------------------------------------------------------|--------------------------------------------|--------------------------------------|-----------------------------|----------------------------------------------------------------------------------------------------------------|-----------------------------------------------------------------------------------------------------------------------|-----------------------------------------------------------------------------------------------------------------------------------------------------------------------------------------------------------------------------------------------------------------------------------------------------|---------------------------------------------------------|
|                                                                         |                                            |                                      |                             |                                                                                                                | reduces bronchial reactivity.                                                                                         |                                                                                                                                                                                                                                                                                                     |                                                         |
| <i>Rhapon-<br/>ticum<br/>scario-<br/>sum</i><br>Lam.                    | Di-<br>atrium.<br>santal.<br>(50)          | Flowers                              | [9]                         | Anti-inflamma-<br>tory<br><br>Depurative<br><br>Tonic                                                          |                                                                                                                       |                                                                                                                                                                                                                                                                                                     |                                                         |
| <i>Fiordal-<br/>iso<br/>rapon-<br/>tico, gi-<br/>ant sca-<br/>biosa</i> |                                            |                                      |                             |                                                                                                                |                                                                                                                       |                                                                                                                                                                                                                                                                                                     |                                                         |
| <i>Scor-<br/>zonera<br/>spp.</i>                                        | Electu-<br>arium<br>Di-<br>ascord.<br>(48) | Epigeal<br>parts                     | 48: [32,33]<br><br>127: [9] | Antibacterial<br><br>Antipyretic<br><br>Disinfectant<br>(wounds)<br><br>Diaphoretic                            | Antibacterial:<br>[266,268,296]<br><br>Antimicrobial,<br>antifungal, anti-<br>inflammatory,<br>antinematodi:<br>[296] |                                                                                                                                                                                                                                                                                                     |                                                         |
| <i>Scorzon-<br/>era</i>                                                 | Aqua<br>Scorzon.<br>nost.<br>(127)         |                                      |                             |                                                                                                                | Respiratory sys-<br>tem diseases                                                                                      | Wounds:<br>[267,296]                                                                                                                                                                                                                                                                                |                                                         |
| <i>Tanace-<br/>tum<br/>parthe-<br/>nium</i><br>(L.)<br>Shc.bip.         | Aqua<br>Mat-<br>ricar.<br>(122)            | Leaves                               | 122:<br>[61,64,65]          | Analgesic<br><br>Anti-inflamma-<br>tory<br><br>Antipyretic<br><br>Aperitive, diges-<br>tive<br><br>Emmenagogue | Analgesic:<br>[270,271]<br><br>Anti-inflamma-<br>tory, Spas-<br>molytic:<br>[270]                                     | Anti-inflam-<br>matory:<br>Parthenolide:<br>inhibits pro-<br>duction of in-<br>flammatory<br>prostaglan-<br>dins.<br><br>Spasmolytic:<br>Sesquiterpene<br>lactones:<br>possibly due<br>to inhibition<br>of the influx<br>of extracellu-<br>lar calcium<br>into vascular<br>smooth mus-<br>cle cells | Anti-in-<br>flamma-<br>tory, spas-<br>molytic:<br>[270] |
| <i>Tanaceto<br/>, feverfew</i>                                          |                                            |                                      |                             | Facilitates birth<br>(Increases the<br>contractions)<br><br>Spasmolytic<br><br>Vermifuge                       |                                                                                                                       |                                                                                                                                                                                                                                                                                                     |                                                         |
| Convolvulaceae                                                          |                                            |                                      |                             |                                                                                                                |                                                                                                                       |                                                                                                                                                                                                                                                                                                     |                                                         |
| <i>Convol-<br/>vulus</i>                                                | Electu-<br>arium<br>bened.<br>lax. (19)    | Hypogeal<br>parts,<br>juice<br>Fruit | 19: [16]<br><br>24: [20]    | Antibacterial,<br>Disinfectant<br>(wounds)                                                                     |                                                                                                                       |                                                                                                                                                                                                                                                                                                     |                                                         |

|                                                             |                                               |                               |                 |                                                                        |                               |
|-------------------------------------------------------------|-----------------------------------------------|-------------------------------|-----------------|------------------------------------------------------------------------|-------------------------------|
| <i>scam-<br/>monia</i><br>L.                                | Un-<br>guen-<br>tum ar-<br>tanita<br>(24)     |                               | 81: [42]        | Anti-inflamma-<br>tory                                                 |                               |
| <i>Gialappa,<br/>scam-<br/>mony</i>                         |                                               |                               |                 | Stomach depu-<br>rative                                                |                               |
|                                                             | Un-<br>guen-<br>tum Di-<br>agrid-<br>ium (68) |                               |                 | Diuretic                                                               |                               |
|                                                             |                                               |                               |                 | Expectorant                                                            |                               |
|                                                             |                                               |                               |                 | Laxative                                                               |                               |
|                                                             | Pilulae<br>de<br>Amon.<br>q. (81)             |                               |                 | Scabies (Parasit-<br>icide)                                            |                               |
|                                                             |                                               |                               |                 | Vermifuge                                                              |                               |
| <b>Cucurbitaceae</b>                                        |                                               |                               |                 |                                                                        |                               |
|                                                             |                                               |                               |                 | Anti-inflamma-<br>tory                                                 |                               |
| <i>Bryonia<br/>spp</i>                                      | Un-<br>guen-<br>tum                           | Hypogeal<br>parts             | [10,11]         | Diuretic                                                               |                               |
| <i>Brionia,<br/>bryony</i>                                  | Agrip-<br>pae (7)                             |                               |                 | Edema, extra-<br>vascular fluid<br>accumulation                        | Anti-inflamma-<br>tory: [117] |
|                                                             |                                               |                               |                 | Circulatory sys-<br>tem                                                |                               |
|                                                             | Tro-<br>chiscus<br>Alhan-<br>dal (4)          |                               |                 | Anxiolytic, anti-<br>depressant                                        |                               |
|                                                             |                                               |                               |                 | Anti-inflamma-<br>tory                                                 |                               |
| <i>Citrul-<br/>lus col-<br/>ocynthis</i><br>(L.)<br>Schrاد. | Con-<br>serva<br>Hamech<br>. (14)             |                               |                 | Antihistamine                                                          |                               |
|                                                             | Fruit                                         |                               | 4, 14, 57:      | Stomach depu-<br>rative                                                |                               |
|                                                             | Un-<br>guen-<br>tum ar-<br>tanita<br>(24)     | Fruit, ep-<br>icarpo<br>Seeds | [9]<br>24: [20] | Expectorant                                                            | Anti-inflamma-<br>tory: [138] |
| <i>Colo-<br/>quintide,<br/>bitter ap-<br/>ple</i>           |                                               |                               | 41: [29]        | Laxative                                                               |                               |
|                                                             | Electu-<br>arium<br>Diacca-<br>tol. (41)      |                               |                 | Skin diseases:<br>Scabies (Parasit-<br>icide), Scall, Irri-<br>tations |                               |
|                                                             | Tro-<br>chiscus                               |                               |                 | Scurvy                                                                 |                               |

|                                                                                          |                                                           |                         |                        |                                                                                        |                          |                                                                                         |                          |
|------------------------------------------------------------------------------------------|-----------------------------------------------------------|-------------------------|------------------------|----------------------------------------------------------------------------------------|--------------------------|-----------------------------------------------------------------------------------------|--------------------------|
|                                                                                          | Aland.<br>(57)                                            |                         |                        | Syphilis (cutaneous symptoms only)                                                     |                          |                                                                                         |                          |
|                                                                                          |                                                           |                         |                        | Anti-inflammatory                                                                      |                          |                                                                                         |                          |
| <i>Cucumis melo</i> L.<br><i>Melone, melon</i>                                           | Diatrium. santal. (50)                                    | Seeds                   | [9]                    | Depurative<br>Lymphatic system                                                         | Anti-inflammatory: [147] | Anti-inflammatory: suppresses PGE-2, TNF- $\alpha$ , IL-6, and IL-1 $\beta$ production. | Anti-inflammatory: [147] |
|                                                                                          |                                                           |                         |                        | Tonic                                                                                  |                          |                                                                                         |                          |
| <i>Ecballium elaterium</i> (L.) A. Rich.<br><i>Co-comero asinino, squirting cucumber</i> | Unguentum Agrippae (7)<br>Unguentum artanita (24)         | Hypogeal parts<br>Fruit | 7: [10,11]<br>24: [20] | Stomach depurative<br>Diuretic<br>Edema, extra-vascular fluid accumulation<br>Laxative |                          |                                                                                         |                          |
|                                                                                          |                                                           |                         |                        | Cupressaceae                                                                           |                          |                                                                                         |                          |
| <i>Juniperus communis</i> L.<br><i>Ginepro, common juniper</i>                           | Syrupus d. Artemisie q.p. (96)                            | Galbuli ('bacche')      | [13,19]                | Blood depurative<br>Reinforces nervous system                                          |                          |                                                                                         |                          |
| <i>Juniperus sabina</i> L.<br><i>Sabina, savin</i>                                       | Syrupus d. Artemisie q.p. (96)                            | Non specificato         | [13,19]                | Blood depurative<br>Reinforces nervous system                                          |                          |                                                                                         |                          |
|                                                                                          |                                                           |                         |                        | Cyperaceae                                                                             |                          |                                                                                         |                          |
| <i>Cyperus esculentus</i> L.<br><i>Zigolo, yellow nutgrass</i>                           | Electuarium Diacurcumae (9)<br>Trochiscus d. Cappar. (45) | Hypogeal parts          | 9: [12]<br>45: [9]     | Anti-inflammatory<br>Depurative<br>Diuretic<br>Emmenagogue<br>Airways (non-specified)  | Anti-inflammatory: [153] |                                                                                         |                          |

|                                         |                            |                                 |      |                                                                         |                                                      |                                                                                                                           |                          |
|-----------------------------------------|----------------------------|---------------------------------|------|-------------------------------------------------------------------------|------------------------------------------------------|---------------------------------------------------------------------------------------------------------------------------|--------------------------|
|                                         |                            |                                 |      | Gastrointestinal disorders (non-specified)                              |                                                      |                                                                                                                           |                          |
|                                         |                            |                                 |      | Thermogenic                                                             |                                                      |                                                                                                                           |                          |
| Dryopteridaceae                         |                            |                                 |      |                                                                         |                                                      |                                                                                                                           |                          |
| <i>Dryopteris filix-mas</i> (L.) Schott | Unguentum ar-tanita (24)   | Hypogeal parts, Resin           | [20] | Antibacterial (Tuberculosis)<br><br>Anti-inflammatory<br><br>Depurative | Anti-inflammatory: [160]                             | Anti-inflammatory: inhibits acute phase of inflammatory responses (histamine, serotonin, prostaglandins, and bradykinin). | Anti-inflammatory: [160] |
| <i>Felce maschio, male fern</i>         |                            |                                 |      |                                                                         |                                                      |                                                                                                                           |                          |
| Equisetaceae                            |                            |                                 |      |                                                                         |                                                      |                                                                                                                           |                          |
| <i>Equisetum arvense</i> L.             |                            |                                 |      |                                                                         |                                                      |                                                                                                                           |                          |
| or                                      | Aqua aequi (3, 16)         | Fusti Leaves                    | [8]  | Gastric ulcer                                                           |                                                      |                                                                                                                           |                          |
| <i>Equisetum hyemale</i> L.             |                            |                                 |      |                                                                         |                                                      |                                                                                                                           |                          |
| <i>Equiseto, horsetail</i>              |                            |                                 |      |                                                                         |                                                      |                                                                                                                           |                          |
| Euphorbiaceae                           |                            |                                 |      |                                                                         |                                                      |                                                                                                                           |                          |
| <i>Euphorbia esula</i> L.               | Electuarium bened. Lax(19) | Hypogeal parts<br>Epigeal parts | [16] | Laxative                                                                |                                                      |                                                                                                                           |                          |
| <i>Esula, leafy spurge</i>              |                            |                                 |      |                                                                         |                                                      |                                                                                                                           |                          |
| <i>Euphorbia</i> spp                    | Unguentum ar-tanita (24)   | Epigeal parts                   | [20] | Laxative<br><br>Stomach depurative<br><br>Vermifuge                     | Laxative: [165]<br><br>Vermifuge/Anthelmintic: [164] | Laxative: increases mRNA and protein expressions of aquaporin 3 and 4 in mucosal epithelial cells in the colon            | Laxative: [165]          |
| <i>Euforbio, spurge</i>                 |                            |                                 |      |                                                                         |                                                      |                                                                                                                           |                          |
| Gentianaceae                            |                            |                                 |      |                                                                         |                                                      |                                                                                                                           |                          |

|                                             |                                      |                                     |              |                                                               |                                       |                                                                                                                                                   |                                   |
|---------------------------------------------|--------------------------------------|-------------------------------------|--------------|---------------------------------------------------------------|---------------------------------------|---------------------------------------------------------------------------------------------------------------------------------------------------|-----------------------------------|
| <hr/>                                       |                                      |                                     |              |                                                               |                                       |                                                                                                                                                   |                                   |
| <i><b>Centaurium erythraea</b></i><br>Rafn. | Syrupus<br>d. Artemisie<br>q.p. (96) | Flowering aerial<br>parts<br>Leaves | 96: [13,19]  | Antipyretic<br><br>Antiviral<br><br>Blood depurative          | Antipyretic:<br>[123]                 |                                                                                                                                                   |                                   |
| <i>Centauria minore, European centaury</i>  | Aqua Cent.<br>Min.<br>(140)          |                                     | 140: [9]     | Liver (hepatoprotector, etc.)                                 | Hepatoprotector:<br>[124]             |                                                                                                                                                   |                                   |
| <hr/>                                       |                                      |                                     |              |                                                               |                                       |                                                                                                                                                   |                                   |
| Reinforces nervous system                   |                                      |                                     |              |                                                               |                                       |                                                                                                                                                   |                                   |
| <hr/>                                       |                                      |                                     |              |                                                               |                                       |                                                                                                                                                   |                                   |
| <b>Hypericaceae</b>                         |                                      |                                     |              |                                                               |                                       |                                                                                                                                                   |                                   |
| <i><b>Hypericum perforatum</b></i> L.       | Oleum Hyperic.<br>q.pl.<br>(104)     | Flowering aerial<br>parts           | [52,285,286] | Antibacterial, disinfectant (wounds)<br><br>Local anaesthetic | Antibacterial:<br>[180]               | Anti-inflammatory: inhibits 5-lipoxygenase. Inhibits human inducible nitric oxide synthase (iNOS) mRNA, protein, and nitric oxide (NO) production | Anti-inflammatory: [179]          |
| <i>Iperico, St. John's wort</i>             |                                      |                                     |              | Anti-inflammatory<br><br>Otitis                               | Anti-inflammatory: [179]              |                                                                                                                                                   |                                   |
| <hr/>                                       |                                      |                                     |              |                                                               |                                       |                                                                                                                                                   |                                   |
| <b>Iridaceae</b>                            |                                      |                                     |              |                                                               |                                       |                                                                                                                                                   |                                   |
| <i><b>Crocus</b> spp.</i><br><br>or         | Electuarium<br>Diacurcumae<br>(9)    |                                     | 9: [12]      | Astringent for gums<br><br>Expectorant                        |                                       | Gastrointestinal disorders (ulcer): prevents gastric mucosa damage (enriches glutathione levels, reduces lipid peroxidation).                     |                                   |
| <i>Crocus sativus</i> L.                    | Electuarium bened.<br>lax. (19)      | Flowers, solo pistilli              | 19: [16]     | Laxative                                                      | Gastrointestinal disorders: [143,145] |                                                                                                                                                   | Gastrointestinal disorders: [143] |
| <i>Croco, zafferano, saffron</i>            | Pilulae de Cinglo. (69)              |                                     | 69: [9]      | Myorelaxant                                                   | Airways: [144]                        | Airways: <i>C. sativus</i> : reduces NO, iNOS, and inflammatory cytokines levels in lung tissues.                                                 |                                   |
|                                             |                                      |                                     |              | Airways (non-specified)                                       | Sedative: [146]                       | Saffron and kaempferol: reduce the production of NO, and                                                                                          | Airways: [144]                    |
| <hr/>                                       |                                      |                                     |              |                                                               |                                       |                                                                                                                                                   |                                   |
| Gastrointestinal disorders (non-specified)  |                                      |                                     |              |                                                               |                                       |                                                                                                                                                   |                                   |
| Thermogenic                                 |                                      |                                     |              |                                                               |                                       |                                                                                                                                                   |                                   |
| <hr/>                                       |                                      |                                     |              |                                                               |                                       |                                                                                                                                                   |                                   |



|                                                                                                                                                                     |                                         |                                |                      |                                                                                |                                                                                                                                                                                                                                          |
|---------------------------------------------------------------------------------------------------------------------------------------------------------------------|-----------------------------------------|--------------------------------|----------------------|--------------------------------------------------------------------------------|------------------------------------------------------------------------------------------------------------------------------------------------------------------------------------------------------------------------------------------|
|                                                                                                                                                                     |                                         |                                |                      |                                                                                | inflammatory mediators in the serum and bronchoalveolar lavage fluid. Increase anti-inflammatory mediators. Smooth muscle relaxant effects on tracheal smooth muscle (stimulate $\beta$ -adrenoceptor and inhibit muscarinic receptors). |
| <i>Iris tuberosa</i> L.                                                                                                                                             |                                         |                                |                      |                                                                                |                                                                                                                                                                                                                                          |
| <i>Sin: Hermodactylus tuberosus</i> (L.) Mill.                                                                                                                      | Electu-<br>arium<br>bened.<br>lax. (19) | Hypogeal<br>parts              | 19: [16]<br>82: [43] | Anti-inflam-<br>matory<br><br>Laxative                                         |                                                                                                                                                                                                                                          |
| <i>Ermodatili, snake's-head</i>                                                                                                                                     | Pulvis<br>her-<br>modac.<br>(82)        |                                |                      |                                                                                |                                                                                                                                                                                                                                          |
| <b>Lamiaceae</b>                                                                                                                                                    |                                         |                                |                      |                                                                                |                                                                                                                                                                                                                                          |
| <i>Clino-<br/>podium<br/>nepeta</i><br>subsp.<br><i>glandu-<br/>losum</i><br>(Req.)<br>Govaert<br>s<br><i>Sin: Cal-<br/>amintha<br/>offici-<br/>nalis</i><br>Moench | Tro-<br>chiscus<br>d. Cap-<br>par. (45) | Flower-<br>ing aerial<br>parts | [9]                  | Anti-inflam-<br>matory<br><br>Kidney stones<br><br>Diuretic<br><br>Emmenagogue |                                                                                                                                                                                                                                          |

|                                                                     |                                    |                         |                   |                                            |                                                      |                                                  |                          |
|---------------------------------------------------------------------|------------------------------------|-------------------------|-------------------|--------------------------------------------|------------------------------------------------------|--------------------------------------------------|--------------------------|
| <i>Nepeta, lesser calamint</i>                                      |                                    |                         |                   |                                            |                                                      |                                                  |                          |
| <i>Glechoma hederacea</i> L.                                        | Syrupus heder. terres. (35)        | Epigeal parts           | 35: [27,285,286]  | Anti-inflammatory                          | Anti-inflammatory: [173]                             | Anti-inflammatory: Inhibits NO, iNOS, and COX-2. | Anti-inflammatory: [173] |
|                                                                     | Extrac-tus haed. terrest. (69)     |                         | 69: [41,285,286]  | Antitussive                                |                                                      |                                                  |                          |
|                                                                     |                                    |                         |                   | Cephalea                                   |                                                      |                                                  |                          |
|                                                                     |                                    |                         |                   | Wound healing                              |                                                      |                                                  |                          |
|                                                                     |                                    |                         |                   | Choleretic                                 |                                                      |                                                  |                          |
| <i>Edera terrestre, ground ivy</i>                                  | Extrac-tus haed. terrest. (75, 87) |                         | 75, 87: [285,286] | Diaphoretic                                |                                                      |                                                  |                          |
|                                                                     |                                    |                         |                   | Diuretic                                   |                                                      |                                                  |                          |
|                                                                     |                                    |                         |                   | Emmenagogue                                |                                                      |                                                  |                          |
|                                                                     | Aqua hed.ter-rest. (121)           |                         |                   | Jaundice                                   |                                                      |                                                  |                          |
| <i>La-vandula dentata</i> L.<br><i>Spig-onardo, French lavender</i> | Electu-arium Diacur-cumae (9)      | Flower-ing aerial parts |                   | Aperitive, diges-tive                      | Anti-asthma, anti-inflamma-tory, antioxi-dant: [184] |                                                  |                          |
|                                                                     |                                    |                         |                   | Anti-inflamma-tory                         |                                                      |                                                  |                          |
|                                                                     | Tro-chiscus Absyn-thi (11)         |                         | 9: [12]           | Anti-tu-bercolosis                         |                                                      |                                                  |                          |
|                                                                     |                                    |                         |                   | Kidney stones                              |                                                      |                                                  |                          |
|                                                                     |                                    |                         | 11: [9]           | Depurative                                 |                                                      |                                                  |                          |
|                                                                     | Electu-arium bened. lax. (19)      |                         | 19: [16]          | Blood depura-tive                          |                                                      |                                                  |                          |
|                                                                     |                                    |                         | 24: [20]          |                                            |                                                      |                                                  |                          |
|                                                                     | Un-guen-tum ar-tanita (24)         |                         | 29: [23]          | Laxative                                   |                                                      |                                                  |                          |
|                                                                     |                                    |                         | 96: [13,19]       | Airways (non-specified)                    |                                                      |                                                  |                          |
|                                                                     | Oleum. Spica. (29)                 |                         |                   | Gastrointestinal disorders (non-specified) |                                                      |                                                  |                          |
|                                                                     | Syrupus d.                         |                         |                   | Reinforces nerv-ous system                 |                                                      |                                                  |                          |

|                                                       |                                           |                                          |                     |                                                             |                                                                |                                                                                                                                                                |                                                                    |
|-------------------------------------------------------|-------------------------------------------|------------------------------------------|---------------------|-------------------------------------------------------------|----------------------------------------------------------------|----------------------------------------------------------------------------------------------------------------------------------------------------------------|--------------------------------------------------------------------|
|                                                       | Artemi-<br>sie q.p.<br>(96)               |                                          |                     | Rubefacient                                                 |                                                                |                                                                                                                                                                |                                                                    |
|                                                       |                                           |                                          |                     | Thermogenic                                                 |                                                                |                                                                                                                                                                |                                                                    |
| <i>Melissa<br/>offici-<br/>nalis</i> L.               | Aqua<br>Melisse.<br>(123)                 | Leaves<br>Flower-<br>ing aerial<br>parts | [66,67,285,<br>286] | Spasmolytic                                                 | Spasmolytic:<br>[191]                                          |                                                                                                                                                                |                                                                    |
| <i>Melissa,<br/>lemon<br/>balm</i>                    |                                           |                                          |                     | Tonic                                                       |                                                                |                                                                                                                                                                |                                                                    |
| <i>Mentha<br/>aquat-<br/>ica</i> L.                   |                                           |                                          |                     | Anticonvulsant                                              |                                                                |                                                                                                                                                                |                                                                    |
| <i>Menta<br/>acquat-<br/>ica, wa-<br/>ter mint</i>    | Oleum<br>Sampsu<br>c. (101)               | Leaves                                   | [49,285,286<br>]    | Facilitates birth<br>(Increases the<br>contractions)        |                                                                |                                                                                                                                                                |                                                                    |
|                                                       |                                           |                                          |                     | Paralysis                                                   |                                                                |                                                                                                                                                                |                                                                    |
| <i>Mentha<br/>pulegiu<br/>m</i> L.                    | Syrupus<br>d. Arte-<br>misie<br>q.p. (96) | Aerial<br>parts                          | [13,19]             | Blood depura-<br>tive                                       | Antimicrobial:<br>[193]                                        |                                                                                                                                                                |                                                                    |
| <i>Puleggio,<br/>penny-<br/>royal</i>                 |                                           |                                          |                     | Reinforces nerv-<br>ous system                              | Circulatory sys-<br>tem:<br>[192]                              |                                                                                                                                                                |                                                                    |
| <i>Mentha<br/>spp.</i>                                | Em-<br>plastru<br>m crus-<br>tae          | Leaves                                   | [9]                 | Antibacterial,<br>disinfectant, as-<br>tringent<br>(wounds) |                                                                |                                                                                                                                                                |                                                                    |
| <i>Menta,<br/>mint</i>                                | panis m.<br>(78)                          |                                          |                     | Circulatory sys-<br>tem                                     |                                                                |                                                                                                                                                                |                                                                    |
| <i>Origa-<br/>num<br/>dictam-<br/>nus</i> L.          | Syrupus<br>d. Arte-<br>misie<br>q.p. (96) | Non<br>specifi-<br>cato                  | [13,19]             | Blood depura-<br>tive                                       |                                                                |                                                                                                                                                                |                                                                    |
| <i>Dittamo<br/>di creta,<br/>dittany<br/>of Crete</i> |                                           |                                          |                     | Reinforces nerv-<br>ous system                              |                                                                |                                                                                                                                                                |                                                                    |
| <i>Origa-<br/>num<br/>ma-<br/>jorana</i><br>L.        | Syrupus<br>d. Arte-<br>misie<br>q.p. (96) | Non<br>specifi-<br>cato                  | 96: [13,19]         | Anticonvulsant                                              |                                                                | Reinforce<br>nervous sys-<br>tem (anti-de-<br>pressant):<br>Essential oil:<br>involves do-<br>paminergic<br>(D1 and D2),<br>serotonergic<br>(5HT1A, 5-<br>HT2A | Reinforce<br>nervous<br>system<br>(anti-de-<br>pressant):<br>[208] |
| <i>Maggio-<br/>rana,<br/>sweet<br/>marjo-<br/>rum</i> | Oleum<br>Sampsu<br>c. (101)               | Leaves                                   | 101: [49]           | Blood depura-<br>tive                                       | Reinforce nerv-<br>ous system<br>(Anti-depres-<br>sant): [208] |                                                                                                                                                                |                                                                    |
|                                                       |                                           |                                          |                     | Facilitates birth<br>(Increases the<br>contractions)        |                                                                |                                                                                                                                                                |                                                                    |
|                                                       |                                           |                                          |                     | Paralysis                                                   |                                                                |                                                                                                                                                                |                                                                    |

|                                         |                                   |               |                          |                                                                |                                                                  |                                                                                   |                                   |
|-----------------------------------------|-----------------------------------|---------------|--------------------------|----------------------------------------------------------------|------------------------------------------------------------------|-----------------------------------------------------------------------------------|-----------------------------------|
|                                         |                                   |               |                          | Reinforces nervous system                                      |                                                                  | receptors), and noradrenergic ( $\alpha 1$ and $\alpha 2$ adrenoceptors) systems. |                                   |
|                                         |                                   |               |                          | Carminative                                                    |                                                                  |                                                                                   |                                   |
| <i>Origanum vulgare</i> L.              | Electuarium d. Bac. laur. (54,80) | Leaves        | 54, 80: [9]              | Blood depurative                                               |                                                                  |                                                                                   |                                   |
|                                         |                                   |               | 96: [13,19]              | Diuretic                                                       |                                                                  |                                                                                   |                                   |
| <i>Origano, oregano</i>                 | Syrupus d. Artemisie q.p. (96)    |               |                          | Emmenagogue                                                    |                                                                  |                                                                                   |                                   |
|                                         |                                   |               |                          | Reinforces nervous system                                      |                                                                  |                                                                                   |                                   |
| <i>Rosmarinus officinalis</i> L.        | Unguentum Pectorale (15)          | Leaves        | [13]                     | Airways                                                        | Antimicrobial: [243,244]<br>Anti-inflammatory ed Analgesic [243] | Antimicrobial: inhibits mono and polymicrobial biofilms.                          | Antimicrobial: [244]              |
| <i>Rosmarino, rosemary</i>              |                                   |               |                          |                                                                |                                                                  |                                                                                   |                                   |
| <i>Salvia officinalis</i> L.            | Aqua Pulmon. (143)                | Leaves        | [9]                      | Circulatory system                                             |                                                                  |                                                                                   |                                   |
| <i>Salvia, sage</i>                     |                                   |               |                          |                                                                |                                                                  |                                                                                   |                                   |
|                                         | Syrupus Betton. (97)              |               |                          |                                                                |                                                                  |                                                                                   |                                   |
| <i>Stachys officinalis</i> (L.) Trevis. | Syrupus d. s. Betton. (99)        | Epigeal parts | 97, 99, 116: [9,285,286] | Anti-depressant, antipsychotic, effects on CNS, mental illness |                                                                  |                                                                                   |                                   |
|                                         | Syrupus Betonic. (116)            |               | 132: [71]                | Diuretic                                                       |                                                                  |                                                                                   |                                   |
| <i>Betonica, betony</i>                 | Aqua Betton. (132)                |               |                          |                                                                |                                                                  |                                                                                   |                                   |
|                                         |                                   |               |                          |                                                                |                                                                  |                                                                                   |                                   |
| <i>Teucrium scorodium</i> L.            | Electuarium Diacurcumae (9)       | Epigeal parts | 9: [12]<br>48: [32,33]   | Antibacterial, Disinfectant (wounds)<br>Antipyretic            | Gastrointestinal disorders: [272]                                | Gastrointestinal disorders: reduces oxidative stress in pancreatic islets         | Gastrointestinal disorders: [272] |

|                                                                                         |                                            |                  |                                   |                                                                                                                           |                                                           |                                                                                                            |                                    |
|-----------------------------------------------------------------------------------------|--------------------------------------------|------------------|-----------------------------------|---------------------------------------------------------------------------------------------------------------------------|-----------------------------------------------------------|------------------------------------------------------------------------------------------------------------|------------------------------------|
| <i>Scordio,<br/>water<br/>german-<br/>der</i>                                           | Electu-<br>arium<br>Di-<br>ascord.<br>(48) |                  |                                   | Diaphoretic<br><br>Airways (non-<br>specified)<br><br>Gastrointestinal<br>disorders (non-<br>specified)                   |                                                           |                                                                                                            |                                    |
| <hr/>                                                                                   |                                            |                  |                                   |                                                                                                                           |                                                           |                                                                                                            |                                    |
| Thermogenic                                                                             |                                            |                  |                                   |                                                                                                                           |                                                           |                                                                                                            |                                    |
| <hr/>                                                                                   |                                            |                  |                                   |                                                                                                                           |                                                           |                                                                                                            |                                    |
| Anticonvulsant                                                                          |                                            |                  |                                   |                                                                                                                           |                                                           |                                                                                                            |                                    |
| <hr/>                                                                                   |                                            |                  |                                   |                                                                                                                           |                                                           |                                                                                                            |                                    |
| Paralysis                                                                               |                                            |                  |                                   |                                                                                                                           |                                                           |                                                                                                            |                                    |
| <hr/>                                                                                   |                                            |                  |                                   |                                                                                                                           |                                                           |                                                                                                            |                                    |
| <i>Thymus<br/>spp</i>                                                                   | Con-<br>serva<br>Hamech<br>(14)            | Leaves           | 14: [9]                           | Skin diseases:<br>scabies (parasiti-<br>cide), scall, irri-<br>tations                                                    | Anticonvulsant:<br>[274]                                  |                                                                                                            |                                    |
| <i>Timo,<br/>thyme</i>                                                                  | Oleum<br>Sampsu<br>c. (101)                |                  | 101: [49]                         | Scurvy<br><br>Syphilis (cutane-<br>ous symptoms<br>only)                                                                  | Skin diseases<br>(danni da radia-<br>zione UVB):<br>[275] |                                                                                                            |                                    |
| <hr/>                                                                                   |                                            |                  |                                   |                                                                                                                           |                                                           |                                                                                                            |                                    |
| Stimulates birth<br>(increases the<br>contractions)                                     |                                            |                  |                                   |                                                                                                                           |                                                           |                                                                                                            |                                    |
| <hr/>                                                                                   |                                            |                  |                                   |                                                                                                                           |                                                           |                                                                                                            |                                    |
| <i>Vitex<br/>agnus-<br/>castus</i><br>L.<br><i>Agno-<br/>casto,<br/>chaste<br/>tree</i> | Tro-<br>chiscus<br>d. Cap-<br>par. (45)    | Seeds            | [9]                               | Anti-inflamma-<br>tory<br><br>Depurative<br><br>Diuretic                                                                  | Anti-inflamma-<br>tory: [280]                             |                                                                                                            |                                    |
| <hr/>                                                                                   |                                            |                  |                                   |                                                                                                                           |                                                           |                                                                                                            |                                    |
| Emmenagogue                                                                             |                                            |                  |                                   |                                                                                                                           |                                                           |                                                                                                            |                                    |
| <hr/>                                                                                   |                                            |                  |                                   |                                                                                                                           |                                                           |                                                                                                            |                                    |
| Lauraceae                                                                               |                                            |                  |                                   |                                                                                                                           |                                                           |                                                                                                            |                                    |
| <hr/>                                                                                   |                                            |                  |                                   |                                                                                                                           |                                                           |                                                                                                            |                                    |
| <i>Cin-<br/>namom-<br/>um<br/>cam-<br/>phora</i><br>(L.) J.<br>Presl                    | Un-<br>guen-<br>tum<br>Lapatÿ<br>(6)       | Leaves<br>Scorza | 6, 76:<br>[10,11]<br><br>44: [30] | Antifungal (tri-<br>cofito)<br><br>Parasiticide<br>(parasitosis that<br>causes intermit-<br>tent fever, i.e.,<br>malaria) | Antifungal:<br>[132]<br><br>Anti-inflamma-<br>tory: [133] | Anti-inflam-<br>matory:<br>Essential oil:<br>reduces TNF-<br>$\alpha$ , IL-1 $\beta$ , and<br>IL-6 levels. | Anti-in-<br>flamma-<br>tory: [133] |
| <i>Canfora,<br/>camphor</i>                                                             | Un-<br>guen-<br>tum                        |                  |                                   | Antipyretic<br><br>Anti-inflamma-<br>tory                                                                                 | Parasiticide:<br>[134]                                    |                                                                                                            |                                    |
| <hr/>                                                                                   |                                            |                  |                                   |                                                                                                                           |                                                           |                                                                                                            |                                    |

|                                    |                                    |                                                      |                        |  |                                                                       |                                                                    |                                                                                                               |                         |
|------------------------------------|------------------------------------|------------------------------------------------------|------------------------|--|-----------------------------------------------------------------------|--------------------------------------------------------------------|---------------------------------------------------------------------------------------------------------------|-------------------------|
|                                    | Lapat.<br>(76)                     |                                                      |                        |  | Antiviral (herpes)                                                    |                                                                    |                                                                                                               |                         |
|                                    |                                    |                                                      |                        |  | Skin blemishes (scars, freckles, Irritations)                         |                                                                    |                                                                                                               |                         |
|                                    |                                    |                                                      |                        |  | Scurvy                                                                |                                                                    |                                                                                                               |                         |
|                                    |                                    |                                                      |                        |  | Blood depurative                                                      |                                                                    |                                                                                                               |                         |
| <i>Cinnamomum verum</i> J.Presl    | Electuarium Diacurcumae (9)        | Fusto (senza 'sughero' esterno, inteso senza scorza) | 9: [12]<br>96: [13,19] |  | Airways (non-specified)<br>Gastrointestinal disorders (non-specified) | Airways: [135]<br>Gastrointestinal disorders (Anthelmintic): [137] | Airways: cinnamaldehyde: inhibits IL-1 $\beta$ and TNF- $\alpha$ production of macrophages stimulated by LPS. | Airways: [135]          |
| <i>Cannella, cinnamon</i>          | Syrupus d. Artemisie q.p. (96)     |                                                      |                        |  | Reinforce nervous system                                              | Reinforce nervous system: [136]                                    |                                                                                                               |                         |
|                                    |                                    |                                                      |                        |  | Thermogenic                                                           |                                                                    |                                                                                                               |                         |
| <i>Laurus nobilis</i> L.           | Electuarium d. Bac. laur. (54, 80) | Fruit                                                | [9]                    |  | Carminative<br>Diuretico                                              |                                                                    |                                                                                                               |                         |
| <i>Alloro, laurel</i>              |                                    |                                                      |                        |  | Emmenagogue                                                           |                                                                    |                                                                                                               |                         |
|                                    |                                    |                                                      |                        |  | Leguminosae                                                           |                                                                    |                                                                                                               |                         |
| <i>Acacia senegal</i> (L.) Willd.  | Diatrium. santal. (50)             | Gum                                                  | [9]                    |  | Anti-inflammatory<br>Depurative<br>Tonic                              | Anti-inflammatory: [81]                                            | Anti-inflammatory: improves antioxidant levels.                                                               | Anti-inflammatory: [81] |
| <i>Gomma arabica, arabic gum</i>   |                                    |                                                      |                        |  |                                                                       |                                                                    |                                                                                                               |                         |
| <i>Astragalus bustillosii</i> Clos | Diatrium. santal. (50)             | Gum                                                  | [9]                    |  | Anti-inflammatory<br>Depurative<br>Tonic                              |                                                                    |                                                                                                               |                         |
| <i>Astragalo, astragalus</i>       |                                    |                                                      |                        |  |                                                                       |                                                                    |                                                                                                               |                         |
| <i>Galega officinalis</i> L.       | Electuarium Diascord. (48)         | Epigeal parts                                        | [32,33][32,33]         |  | Antibacterial, Disinfectant (wounds)<br>Antipyretic                   | Antibacterial: [172]                                               |                                                                                                               |                         |

|                                                                  |                             |                                 |                                        |                                                  |                                                       |                                                                                                                                               |                          |
|------------------------------------------------------------------|-----------------------------|---------------------------------|----------------------------------------|--------------------------------------------------|-------------------------------------------------------|-----------------------------------------------------------------------------------------------------------------------------------------------|--------------------------|
| <i>Galega, goat's-rue</i>                                        |                             |                                 |                                        | Antiviral                                        |                                                       |                                                                                                                                               |                          |
|                                                                  |                             |                                 |                                        | Respiratory system                               |                                                       |                                                                                                                                               |                          |
|                                                                  |                             |                                 |                                        | Diaphoretic                                      |                                                       |                                                                                                                                               |                          |
|                                                                  |                             |                                 |                                        | Antibacterial, disinfectant (wounds)             |                                                       |                                                                                                                                               |                          |
|                                                                  |                             |                                 |                                        | Anti-inflammatory                                | Anti-inflammatory: inhibits phospholipase A2.         |                                                                                                                                               |                          |
| <i>Glycyrrhiza glabra</i> L.<br><br><i>Liquirizia, liquorice</i> | Electuarium Diacurcumae (9) | Hypogeal parts                  | 9: [12]<br><br>50: [9]<br><br>81: [42] | Antihistamine                                    | Antibacterial, Anti-inflammatory, Parasiticide: [174] | Antihistamine: Glycyrrhizic acid: suppresses levels of IL-4 (restores immune balance TH1/TH2). Attenuates B cells production of IgE and IgG1. | Anti-inflammatory: [174] |
|                                                                  | Diatrium. santal. (50)      |                                 |                                        | Depurative                                       |                                                       |                                                                                                                                               |                          |
|                                                                  |                             |                                 |                                        | Diuretic                                         |                                                       |                                                                                                                                               |                          |
|                                                                  |                             |                                 |                                        | Expectorant                                      |                                                       |                                                                                                                                               |                          |
|                                                                  |                             |                                 |                                        | Laxative                                         |                                                       |                                                                                                                                               |                          |
|                                                                  |                             |                                 |                                        | Airways (non-specified)                          |                                                       |                                                                                                                                               |                          |
|                                                                  |                             |                                 |                                        | Gastrointestinal disorders (non-specified)       |                                                       |                                                                                                                                               |                          |
|                                                                  |                             |                                 |                                        | Scabies (Parasiticide)                           |                                                       |                                                                                                                                               |                          |
|                                                                  |                             | Thermogenic                     |                                        |                                                  |                                                       |                                                                                                                                               |                          |
|                                                                  |                             |                                 |                                        | Tonic                                            |                                                       |                                                                                                                                               |                          |
|                                                                  |                             |                                 |                                        | Emmenagogue                                      |                                                       |                                                                                                                                               |                          |
| <i>Lupinus albus</i> L.                                          | Trochiscus de Mirra (51)    | Seeds (senza tegumento esterno) | [9]                                    | Facilitates birth (Increases the contractions)   |                                                       |                                                                                                                                               |                          |
| <i>Lupino bianco, white lupine</i>                               |                             |                                 |                                        | Menopausal flushing                              |                                                       |                                                                                                                                               |                          |
| <i>Pterocarpus santalinus</i> L.f.                               | Diatrium. santal. (50)      | Legno (senza scorza)            | 50, 78: [9]                            | Antibacterial, Disinfectant, Astringent (wounds) | Antibacterial: [233]                                  | Anti-inflammatory: free radicals scavenger                                                                                                    | Anti-inflammatory: [232] |
|                                                                  | Emplastru                   |                                 |                                        | Anti-inflammatory                                | Anti-inflammatory: [232]                              |                                                                                                                                               |                          |

|                                     |                               |                        |                           |  |                                       |                          |                                                          |                          |
|-------------------------------------|-------------------------------|------------------------|---------------------------|--|---------------------------------------|--------------------------|----------------------------------------------------------|--------------------------|
| <i>Sandalo rosso, red sanders</i>   | m crus-tae panis m. (78)      |                        |                           |  | Circulatory system (microcirculation) |                          |                                                          |                          |
|                                     |                               |                        |                           |  | Depurative                            |                          |                                                          |                          |
|                                     |                               |                        |                           |  | Tonic                                 |                          |                                                          |                          |
| <b>Trigonella foenum-graecum L.</b> | Unguentum Di-althee sub. (61) | Seeds                  | 61: [36,37]               |  | Anti-inflammatory                     | Anti-inflammatory: [276] | Anti-inflammatory: Linolenic acid: inhibits LOX and COX. | Anti-inflammatory: [276] |
| Fieno greco, fenu-greek             |                               |                        |                           |  |                                       |                          |                                                          |                          |
| <b>Liliaceae</b>                    |                               |                        |                           |  |                                       |                          |                                                          |                          |
| <b>Lilium candidum L.</b>           | Oleum Lil. alb. q.pl. (36)    |                        |                           |  | Anti-inflammatory                     |                          |                                                          |                          |
| <i>Giglio bianco, white lily</i>    | Oleum Lil. alb. (95)          | Hypogeal parts Flowers | 36, 95: [28]<br>145: [61] |  | Myorelaxant, Spasmolytic              | Anti-inflammatory: [185] |                                                          |                          |
|                                     | Aqua Flor. lil. alb. (145)    |                        |                           |  |                                       |                          |                                                          |                          |
| <b>Lilium spp.</b>                  | Flores Lil. Com. (147)        | Flowers                | 147: [61]                 |  |                                       |                          |                                                          |                          |
| <i>Giglio, lily</i>                 |                               |                        |                           |  |                                       |                          |                                                          |                          |
| <b>Linaceae</b>                     |                               |                        |                           |  |                                       |                          |                                                          |                          |
| <b>Linum usitatis-simum L.</b>      | Unguentum Di-althee sub. (61) | Seeds                  | 61: [37]                  |  | Anti-inflammatory                     | Anti-inflammatory: [186] | Anti-inflammatory: inhibits COX-1 and COX-2              | Anti-inflammatory: [186] |
| <i>Lino, lin-seed</i>               |                               |                        |                           |  |                                       |                          |                                                          |                          |
| <b>Loranthaceae</b>                 |                               |                        |                           |  |                                       |                          |                                                          |                          |
| <b>Loranthus europaeus Jacq.</b>    | Extractus Vissi. querc. (60)  | Fruit                  | [35,285,286]              |  | Anti-inflammatory                     |                          |                                                          |                          |
|                                     |                               |                        |                           |  | Sore throat                           |                          |                                                          |                          |



|                                                                                             |                                                      |                                   |                         |                                                             |                                                |                                                                                                                 |                                             |
|---------------------------------------------------------------------------------------------|------------------------------------------------------|-----------------------------------|-------------------------|-------------------------------------------------------------|------------------------------------------------|-----------------------------------------------------------------------------------------------------------------|---------------------------------------------|
| Vischio,<br>Euro-<br>pean<br>loranth                                                        |                                                      |                                   |                         |                                                             |                                                |                                                                                                                 |                                             |
| Malvaceae                                                                                   |                                                      |                                   |                         |                                                             |                                                |                                                                                                                 |                                             |
| Althaea<br>offici-<br>nalis L.<br><br>Altea,<br>marsh<br>mallow                             | Un-<br>guen-<br>tum<br>Pecto-<br>rale (15)           | Hypogeal<br>parts                 | 15: [13]                | Anti-inflamma-<br>tory                                      | Anti-inflamma-<br>tory: [99]                   | Anti-inflam-<br>matory:<br>inhibits LPS-<br>induced pro-<br>duction of<br>TNF-α and<br>IL6 in macro-<br>phages. | Anti-in-<br>flamma-<br>tory: [99]           |
|                                                                                             | Un-<br>guen-<br>tum Di-<br>althee<br>sub. (61)       |                                   | 61: [37]                | Expectorant                                                 | Expectorant:<br>[100]                          |                                                                                                                 |                                             |
|                                                                                             | Syrupus<br>Althee.<br>fernet.<br>(98)                |                                   | 98: [9]                 | Mucolytic                                                   |                                                |                                                                                                                 |                                             |
| Myristicaceae                                                                               |                                                      |                                   |                         |                                                             |                                                |                                                                                                                 |                                             |
| Myris-<br>tica fra-<br>grans<br>Houtt.<br><br>Noce<br>moscata,<br>macis,<br>nutmeg,<br>mace | Un-<br>guen-<br>tum<br>Pecto-<br>rale (15)           | Fruit,<br>meso-<br>carpo<br>Seeds | 15: [13]                | Analgesic                                                   |                                                |                                                                                                                 |                                             |
|                                                                                             | Oleum<br>Nucis.<br>myrist.<br>(18)                   |                                   | 18:<br>[15,285,286<br>] | Antibacterial,<br>disinfectant, as-<br>tringent<br>(wounds) |                                                |                                                                                                                 |                                             |
|                                                                                             | Em-<br>plastru<br>m crus-<br>tae<br>panis m.<br>(78) |                                   | 19: [16]                | Anticonvulsant                                              | Analgesic, Anti-<br>inflammatory:<br>[194,197] | Analgesic:<br>ampheta-<br>mine-like ac-<br>tivity                                                               |                                             |
|                                                                                             | Electu-<br>arium<br>bened.<br>lax. (19)              |                                   | 78: [9]                 | Antinflammto-<br>rio                                        | Antibacterial:<br>[194–196]                    | Anticonvul-<br>sant: de-<br>creases dopa-<br>minergic<br>transmission                                           | Analgesic,<br>anticonvul-<br>sant:<br>[194] |
|                                                                                             |                                                      |                                   |                         | Kidney stones,<br>gravel                                    | Anticonvulsant:<br>[194]                       |                                                                                                                 |                                             |
|                                                                                             |                                                      |                                   |                         | Diuretic                                                    | Antioxidant:<br>[195,196]                      |                                                                                                                 |                                             |
|                                                                                             |                                                      |                                   |                         | Circulatory sys-<br>tem                                     | Stomach-ache:<br>[196]                         | Stomach-ache:<br>antibacterial<br>activity<br>against Helico-<br>bacter pylori.                                 | Stomach-<br>ache<br>[196]                   |
|                                                                                             |                                                      |                                   |                         | Facilitates birth<br>(Increases the<br>contractions)        |                                                |                                                                                                                 |                                             |
|                                                                                             |                                                      |                                   |                         | Laxative                                                    |                                                |                                                                                                                 |                                             |
|                                                                                             |                                                      |                                   |                         | Respiratory sys-<br>tem infections,<br>colds                |                                                |                                                                                                                 |                                             |
|                                                                                             |                                                      | Stomach-ache<br>(external use)    |                         |                                                             |                                                |                                                                                                                 |                                             |

| Tonic                          |                                                             |                   |                                                 |                                                                                                                    |                                                                                          |                                                                                                                                                                                                                       |                                  |
|--------------------------------|-------------------------------------------------------------|-------------------|-------------------------------------------------|--------------------------------------------------------------------------------------------------------------------|------------------------------------------------------------------------------------------|-----------------------------------------------------------------------------------------------------------------------------------------------------------------------------------------------------------------------|----------------------------------|
| Myrtaceae                      |                                                             |                   |                                                 |                                                                                                                    |                                                                                          |                                                                                                                                                                                                                       |                                  |
|                                | Trochiscus d. Myrtha. (13)                                  |                   |                                                 | Anticonvulsant                                                                                                     |                                                                                          | Antiulcer: reduces gastric juice volume and total acidity. Increases gastric pH and gastric wall mucus content                                                                                                        |                                  |
| <i>Myrtus communis</i> L.      | Syrupus de Mÿtio (Ingredienti: Syrupus Myrtinus compositus) | Fruit             | 32: [9]<br>101: [21]                            | Astringent, wound healing, hemorrhages<br>Digestive<br>Facilitates birth (Increases the contractions)<br>Paralysis | Antioxidant: [199,200]<br>Antiulcer, neuroprotettivo: [198]                              |                                                                                                                                                                                                                       | Antiulcer, neuroprotector: [198] |
| <i>Mirto, myrtle</i>           | Oleum Sampsu c. (101)                                       |                   |                                                 |                                                                                                                    |                                                                                          | Neuroprotector: protective antioxidant activity.                                                                                                                                                                      |                                  |
| Oleaceae                       |                                                             |                   |                                                 |                                                                                                                    |                                                                                          |                                                                                                                                                                                                                       |                                  |
| <i>Ligustrum vulgare</i> L.    | Syrupus d. Artemisie q.p. (96)                              | Seeds             | [13,19]                                         | Blood depurative<br>Reinforces nervous system                                                                      |                                                                                          |                                                                                                                                                                                                                       |                                  |
| <i>Ligustro, common privet</i> |                                                             |                   |                                                 |                                                                                                                    |                                                                                          |                                                                                                                                                                                                                       |                                  |
|                                | Oil, ingredient of several preparations, such as:           |                   |                                                 | Analgesic<br>Anaesthetic (local)<br>Antibacterial, Disinfectant (wounds)                                           | Antibacterial: [206,207] -olive mill wastewater – extr virgin olive oil by-product [205] | Anti-inflammatory: Phenolic compounds: Inhibit COX-1 and COX-2. Suppress PGE2. Inhibits NF-kB translocation in human monocytes. Protect DNA from oxidative damage. Reduce NF-kB activation, improve NF-kB inhibitors. |                                  |
| <i>Olea europaea</i> L.        | Oleum Sampsu c. (101)                                       | <u>Fruit, oil</u> | 101: [49]<br>102: [50]<br>104: [52]<br>112: [9] | Anticonvulsant<br>Anti-inflammatory<br>Facilitates birth (Increases the contractions)<br>Otitis<br>Paralysis       |                                                                                          |                                                                                                                                                                                                                       | Anti-inflammatory: [207]         |
| <i>Olivo, olio, olive, oil</i> | Oleum de Rutha. (102)<br>Oleum Hyperic. q.pl. (104)         |                   |                                                 |                                                                                                                    | Anti-inflammatory: [111,205,207]                                                         |                                                                                                                                                                                                                       |                                  |

|                                                   |                                                           |                                 |                      |                                                                                          |                                                                                                       |                                                                                                                                                                                             |                                              |
|---------------------------------------------------|-----------------------------------------------------------|---------------------------------|----------------------|------------------------------------------------------------------------------------------|-------------------------------------------------------------------------------------------------------|---------------------------------------------------------------------------------------------------------------------------------------------------------------------------------------------|----------------------------------------------|
|                                                   | Oleum<br>de. ca-<br>parb. s.<br>(112)                     |                                 |                      |                                                                                          |                                                                                                       | Inhibit COX-<br>2, iNOS, and<br>LOX.                                                                                                                                                        |                                              |
| <b>Papaveraceae</b>                               |                                                           |                                 |                      |                                                                                          |                                                                                                       |                                                                                                                                                                                             |                                              |
| <i>Fumaria<br/>offici-<br/>nalis</i> L.           | Syrupus<br>rosatus<br>solutus<br>cum fu-<br>maria<br>(28) | Aerial<br>parts                 | 28, 105,<br>146: [8] | Anti-inflamma-<br>tory                                                                   | Anti-inflamma-<br>tory:<br>[171]                                                                      | Anti-inflam-<br>matory: possi-<br>bly reduces<br>TNF- $\alpha$ and<br>IL-6. Im-<br>proves anti-<br>inflammatory<br>substances<br>(IL-10) and<br>oxidative<br>stress.                        | [171]                                        |
| <i>Fumaria,<br/>drug fu-<br/>mitory</i>           | Syrupus<br>rosatum<br>cum fu-<br>maria<br>(105)           |                                 | 146:<br>[47,286]     | Kidney stones                                                                            | Diuretic:<br>[170]                                                                                    |                                                                                                                                                                                             |                                              |
|                                                   | Aqua<br>Fumar.<br>(146)                                   |                                 |                      |                                                                                          |                                                                                                       |                                                                                                                                                                                             |                                              |
| <i>Papaver<br/>som-<br/>niferum</i><br>L.         | Electu-<br>arium<br>Diacur-<br>cumae<br>(9)               | Unripe<br>fruit<br>Gum<br>Seeds | 9: [12]              | Analgesic<br><br>Astringent for<br>gums<br><br>Expectorant<br><br>Sedative-hyp-<br>notic | Airways:<br>[209]<br><br>Analgesic:<br>[210,211,213,297]<br><br>Antidiarrhoeal,<br>Sedative:<br>[210] | Airways:<br>Opioids: re-<br>duce neuronal<br>rhythmic ac-<br>tivity, induc-<br>ing respira-<br>tory depres-<br>sion.<br><br>Analgesic:<br>opioids inter-<br>action with $\mu$<br>receptors. | Airways:<br>[209]<br><br>Analgesic:<br>[297] |
| <i>Papavero<br/>da oppio,<br/>opium<br/>poppy</i> | Opiatus<br>poter.<br>(55)                                 |                                 | 55: [34]             | Narcotic                                                                                 |                                                                                                       | Neuroprotec-<br>tor: upregu-<br>lating BDNF-<br>TrkB signal-<br>ing                                                                                                                         | Neuropro-<br>tector:<br>[212]                |
|                                                   | Pilulae<br>de Cino-<br>glo. (69)                          |                                 | 69: [9]              | Gastrointestinal<br>disorders (non-<br>specified)                                        | Eccitante:<br>[211]                                                                                   | and thus, re-<br>ducing TNF- $\alpha$<br>neurotoxicity.                                                                                                                                     | Sedative:<br>[210]                           |
|                                                   |                                                           |                                 |                      | Reinforces nerv-<br>ous system                                                           | Neuropro-<br>tezione:<br>[212]                                                                        |                                                                                                                                                                                             |                                              |
|                                                   |                                                           |                                 |                      | Thermogenic                                                                              |                                                                                                       | Sedative: opi-<br>oids anticho-<br>linergic activ-<br>ity.                                                                                                                                  |                                              |
| <b>Pedaliaceae</b>                                |                                                           |                                 |                      |                                                                                          |                                                                                                       |                                                                                                                                                                                             |                                              |

|                                                     |                                   |            |                         |                                              |                                                                      |                                                    |                |
|-----------------------------------------------------|-----------------------------------|------------|-------------------------|----------------------------------------------|----------------------------------------------------------------------|----------------------------------------------------|----------------|
| <i>Sesamum indicum</i> L.                           | Oleum Spica. (29)                 | Seeds, oil | [23]                    | (Sesame oil as a carrier in the preparation) |                                                                      |                                                    |                |
| <i>Sesamo, sesame</i>                               |                                   |            |                         | Astringent (cutaneous)                       |                                                                      |                                                    |                |
|                                                     |                                   |            |                         | Rubefacient                                  |                                                                      |                                                    |                |
| <b>Pinaceae</b>                                     |                                   |            |                         |                                              |                                                                      |                                                    |                |
| <i>Larix</i> spp.                                   |                                   |            |                         | Airways, expectorant                         |                                                                      |                                                    |                |
| or                                                  |                                   |            |                         | Antibacterial, Disinfectant (wounds)         | Antibacterial, antifungal: [183] -colofonia [181,182]                | Airways: smooth muscle relaxant, cough preventing. | Airways: [181] |
| <i>Pinus</i> spp.                                   | Unguentum Di-althee sub. (61)     | Resin      | [37]                    | Anti-inflammatory                            |                                                                      |                                                    |                |
| or                                                  |                                   |            |                         | Depurative                                   | Airways, anti-inflammatory, antioxidant, depurative, diuretic: [181] |                                                    |                |
| <i>Picea</i> spp.                                   |                                   |            |                         | Diuretic                                     |                                                                      |                                                    |                |
| <i>Trementina, colofonia, turpentine, colophony</i> |                                   |            |                         | Laxative                                     |                                                                      |                                                    |                |
|                                                     |                                   |            |                         | Mucolytic                                    |                                                                      |                                                    |                |
|                                                     |                                   |            |                         | Scabies (Parasiticide)                       |                                                                      |                                                    |                |
| <b>Piperaceae</b>                                   |                                   |            |                         |                                              |                                                                      |                                                    |                |
| <i>Piper longum</i> L.                              | Electuarium bened. lax. (19)      | Fruit      | 19: [16]                | Carminative                                  | Anti-inflammatory, Antioxidant: [218]                                |                                                    |                |
| <i>Pepe longo, Indian long pepper</i>               | Electuarium d. Bac. laur. (54,80) |            | 54,80: [9]              | Emmenagogue                                  |                                                                      |                                                    |                |
|                                                     |                                   |            |                         | Laxative                                     |                                                                      |                                                    |                |
| <i>Piper nigrum</i> L.                              | Unguentum ar-tanita (24)          |            |                         | Carminative                                  | Anti-inflammatory: [219,221]                                         |                                                    |                |
|                                                     |                                   |            |                         | Stomach depurative                           |                                                                      |                                                    |                |
| <i>Pepe nero, black pepper</i>                      | Electuarium d. Bac. laur. (54,80) | Fruit      | 24: [20]<br>54, 80: [9] | Diuretic                                     | Antioxidant: [219,220]                                               |                                                    |                |
|                                                     |                                   |            |                         | Emmenagogue                                  | Parasiticide: [221]                                                  |                                                    |                |
|                                                     |                                   |            |                         | Laxative                                     |                                                                      |                                                    |                |
|                                                     |                                   |            |                         | Vermifuge                                    | Digestive: [219]                                                     |                                                    |                |

| Plantaginaceae                                           |                                               |                               |                  |                                                    |                                                                                           |                                                                                                                                                              |                          |
|----------------------------------------------------------|-----------------------------------------------|-------------------------------|------------------|----------------------------------------------------|-------------------------------------------------------------------------------------------|--------------------------------------------------------------------------------------------------------------------------------------------------------------|--------------------------|
| <i>Veronica spp.</i>                                     | Opiatus poter. (55)                           | <u>Non specifi- cato</u> Buds | 55: [34]         | Analgesic                                          | Circulatory sys- tem                                                                      | Anti-inflamma- tory: [278]                                                                                                                                   |                          |
| <i>Veronica</i>                                          | Aqua Pulmon. (143)                            |                               | 143: [9]         | Narcotic                                           |                                                                                           |                                                                                                                                                              |                          |
| Poaceae                                                  |                                               |                               |                  |                                                    |                                                                                           |                                                                                                                                                              |                          |
| <i>Hordeum vul- gare</i> L.                              | Oleum Sup. hord. (26)                         | <u>Seeds (oil)</u>            | [21]             | Intestinal motil- ity                              | Antidiarrhoeal: [177,178] - <u>Epi- geal parts, whole seeds</u>                           | Antidiar- rhoeal: modi- fies gut micro- biota, pro- motes growth of <i>Prevotella</i> and <i>Anaero- vibrio</i> genuses                                      | Antidiar- rhoeal: [177]  |
| <i>Orzo, barley</i>                                      |                                               |                               |                  |                                                    | Constipation: [177] - Whole <u>seeds</u>                                                  | Constipation: increases fecal mass                                                                                                                           | Constipa- tion: [178]    |
| <i>Triti- cum aes- tivum</i> L. subsp. <i>aes- tivum</i> | Em- plastru m crus- tae panis m. (78)         | <u>Fruit</u>                  | [9]              | Antibacterial, Disinfectant, As- tringent (wounds) | Antioxidant, cardioprotctor, circulatory sys- tem: (Sharma et al., 2014 - <u>Leaves</u> ) | Cardioprotec- tor: increases the function of the queen, reduces total cholesterol, LDL. In- creases HDL.                                                     | Cardiopro- tector: [277] |
| <i>Grano, wheat</i>                                      |                                               |                               |                  | Circulatory sys- tem                               |                                                                                           |                                                                                                                                                              |                          |
| Polygonaceae                                             |                                               |                               |                  |                                                    |                                                                                           |                                                                                                                                                              |                          |
| <i>Rheum offici- nale</i> L.                             | Electu- arium Diacur- cumae (9)               | Hypogeal parts Epigeal parts  | 9: [12]          | Airways (non- specified)                           | Airways, anti- inflammatory, gastrointestinal disorders, ther- mogenic: [237]             | Airways: de- creases capil- lary permea- bility to albu- min, myelop- eroxidase ac- tivity, NO concentration, phospho- lipase-A2 ac- tivity, and TNF levels. |                          |
| <i>Rabar- baro, rhubarb</i>                              | Syrupus Cichor. Com. Reub. Gul. -n. (94, 107) |                               | 94, 107: [47,48] | Gastrointestinal disorders (non- specified)        | Antioxidant: [236]                                                                        |                                                                                                                                                              | Airways: [237]           |
| <i>Rumex con- glomer- atus</i> Murray                    | Un- guen- tum Lapaty (6)                      | Leaves Epigeal parts          | 6,76: [10,11]    | Antifungal                                         | Antibacterial: [248]                                                                      |                                                                                                                                                              |                          |
| <i>Lapazio acuto,</i>                                    |                                               |                               |                  | Anti-inflamma- tory                                | Antioxidant: [247]                                                                        |                                                                                                                                                              |                          |
|                                                          |                                               |                               |                  | Antiviral (her- pes)                               |                                                                                           |                                                                                                                                                              |                          |

|                                                       |                                           |                   |             |  |                                                                                |                                                                                                                |                                                                                                      |                                    |
|-------------------------------------------------------|-------------------------------------------|-------------------|-------------|--|--------------------------------------------------------------------------------|----------------------------------------------------------------------------------------------------------------|------------------------------------------------------------------------------------------------------|------------------------------------|
| <i>clustered dock</i>                                 | Un-<br>guen-<br>tum<br>Lapat.<br>(76)     |                   |             |  |                                                                                |                                                                                                                |                                                                                                      |                                    |
| <b>Polypodiaceae</b>                                  |                                           |                   |             |  |                                                                                |                                                                                                                |                                                                                                      |                                    |
|                                                       |                                           |                   |             |  | Stomach depu-<br>rative                                                        |                                                                                                                |                                                                                                      |                                    |
|                                                       |                                           |                   |             |  | Laxative                                                                       |                                                                                                                |                                                                                                      |                                    |
| <i>Polypo-<br/>dium<br/>vulgare</i><br>L.             | Con-<br>serva<br>Hamech<br>. (14)         | Hypogeal<br>parts | 14: [9]     |  | Skin diseases:<br>Scabies (parasit-<br>icide), scall, itch,<br>and irritations | Analgesic, Anti-<br>bacterial, Anti-<br>viral, Digestive,<br>laxative, Scurvy:<br>[224]                        |                                                                                                      |                                    |
| <i>Polipo-<br/>dio, poly-<br/>pody</i>                | Un-<br>guen-<br>tum ar-<br>tanita<br>(24) | Leaves            | 24: [20]    |  | Scurvy                                                                         |                                                                                                                |                                                                                                      |                                    |
|                                                       |                                           |                   |             |  | Syphilis (cutane-<br>ous symptoms<br>only)                                     |                                                                                                                |                                                                                                      |                                    |
| <b>Vermifuge</b>                                      |                                           |                   |             |  |                                                                                |                                                                                                                |                                                                                                      |                                    |
| <b>Portulacaceae</b>                                  |                                           |                   |             |  |                                                                                |                                                                                                                |                                                                                                      |                                    |
| <i>Portu-<br/>laca<br/>oleracea</i><br>L.             | Di-<br>atrium.<br>santal.<br>(50)         | Hypogeal<br>parts | 50: [9]     |  | Anti-inflamma-<br>tory                                                         |                                                                                                                |                                                                                                      |                                    |
| <i>Portu-<br/>laca,<br/>common<br/>purslane</i>       | Syrupus<br>d. Arte-<br>misie<br>q.p. (96) | Epigeal<br>parts  | 96: [13,19] |  | Blood depura-<br>tive/Lymphatic<br>system                                      | Anti-hypoxia,<br>anti-inflamma-<br>tory, antioxi-<br>dant, hepatopro-<br>tector, neuro-<br>protector:<br>[225] | Anti-inflam-<br>matory: inhib-<br>its TNF- $\alpha$ lev-<br>els and NF- $\kappa$ B<br>translocation. | Anti-in-<br>flamma-<br>tory: [225] |
|                                                       |                                           |                   |             |  | Effects on Nerv-<br>ous System                                                 |                                                                                                                |                                                                                                      |                                    |
| <b>Tonic</b>                                          |                                           |                   |             |  |                                                                                |                                                                                                                |                                                                                                      |                                    |
| <b>Primulaceae</b>                                    |                                           |                   |             |  |                                                                                |                                                                                                                |                                                                                                      |                                    |
| <i>Cycla-<br/>men<br/>hederi-<br/>folium</i><br>Aiton | Un-<br>guen-<br>tum Ar-<br>tanita<br>(24) | Epigeal<br>parts  | [20]        |  | Antibacterial<br>(Tuberculosis,<br>ointment)                                   |                                                                                                                |                                                                                                      |                                    |
| <i>Ciclamin<br/>o, cycla-<br/>men</i>                 |                                           |                   |             |  | Anti-inflamma-<br>tory                                                         | Anti-inflamma-<br>tory:<br>[151]                                                                               |                                                                                                      |                                    |
|                                                       |                                           |                   |             |  | Stomach depu-<br>rative                                                        |                                                                                                                |                                                                                                      |                                    |
|                                                       |                                           |                   |             |  | Laxative                                                                       |                                                                                                                |                                                                                                      |                                    |
| <b>Vermifuge</b>                                      |                                           |                   |             |  |                                                                                |                                                                                                                |                                                                                                      |                                    |
| <b>Pteridaceae</b>                                    |                                           |                   |             |  |                                                                                |                                                                                                                |                                                                                                      |                                    |

|                                      |                             |                                      |              |                                                                    |                                                                                                                      |                                                                                                                                        |                                                       |
|--------------------------------------|-----------------------------|--------------------------------------|--------------|--------------------------------------------------------------------|----------------------------------------------------------------------------------------------------------------------|----------------------------------------------------------------------------------------------------------------------------------------|-------------------------------------------------------|
| <i>Adiantum capillus-venereis</i> L. | Syrupus cap. ven. (103)     | Epigeal parts                        | [51,285,286] | Anti-inflammatory<br>Antipyretic<br>Antiviral (Herpes)             | Antimicrobial,<br>Antiviral: [87]<br>Anti-inflammatory: [88-90]<br>Antipyretic: [88]<br>(polyherbaceous formulation) | Anti-inflammatory: Flavonoids, sterols, terpenoids: possibly decreases histamine, 5HT, prostaglandines, bradykinins. Suppresses NF-κB. | Anti-inflammatory: [89,90]                            |
| <b>Ranunculaceae</b>                 |                             |                                      |              |                                                                    |                                                                                                                      |                                                                                                                                        |                                                       |
| <i>Nigella damascena</i> L.          | Trochiscus d. Capar. (45)   | Seeds                                | [9]          | Anti-inflammatory<br>Kidney stones<br>Diuretic<br>Emmenagogue      | Antioxidant, Diuretic: [203]                                                                                         | Diuretic: increases diuresis volume and Na <sup>+</sup> and K <sup>+</sup> excretion.                                                  | Diuretic: [203]                                       |
| <i>Nigella sativa</i> L.             | Electuarium d. Bac. (54,80) | Seeds                                | 54, 80: [9]  | Carminative<br>Diuretic<br>Emmenagogue                             | Anti-inflammatory, Emmenagogue, estrogenic: [204]<br>Antioxidant: [203,204]<br>Diuretic: [203]                       |                                                                                                                                        |                                                       |
| <i>Nigella, black cumin</i>          |                             |                                      |              |                                                                    |                                                                                                                      |                                                                                                                                        |                                                       |
| <b>Rosaceae</b>                      |                             |                                      |              |                                                                    |                                                                                                                      |                                                                                                                                        |                                                       |
| <i>Agrimonia eupatoria</i> L.        | Trochiscus d. Capar. (45)   | <u>Hypogeal parts</u><br><u>Buds</u> | 45, 143: [9] | Anti-inflammatory<br>Diuretic<br>Circulatory system<br>Emmenagogue | Anti-inflammatory, Antioxidant: [93] - <u>Aerial parts</u>                                                           |                                                                                                                                        |                                                       |
| <i>Agrimonia, agrimony</i>           | Aqua Pulmon. (143)          |                                      |              |                                                                    |                                                                                                                      |                                                                                                                                        |                                                       |
| <i>Malus domestica</i> Borkh.        | Syrupus d. Pomid.s. (30)    | Flowers<br>Fruit                     | 30: [9]      | Antidiarrhoeal                                                     | Antidiarrhoeal: [188]<br>(unripe apples)<br>Anti-inflammatory: [187]<br>Airways:                                     | Antidiarrhoeal: Polyphenols: inhibit ADP ribosylation of agmatine (induced by cholera toxin). Inhibit                                  | Antidiarrhoeal: [188]<br><br>Anti-inflammatory: [187] |
| <i>Melo, Mela renetta, apple</i>     | Pulvis Flor. Malu. (113)    |                                      | 113: [14]    | Expectorant                                                        |                                                                                                                      |                                                                                                                                        |                                                       |

|                                         |                              |                   |                                             |                                                                                                                     |                                                          |                                                                  |                            |  |
|-----------------------------------------|------------------------------|-------------------|---------------------------------------------|---------------------------------------------------------------------------------------------------------------------|----------------------------------------------------------|------------------------------------------------------------------|----------------------------|--|
|                                         |                              |                   |                                             |                                                                                                                     | [189]                                                    | enzymatic activity of cholera toxin.                             |                            |  |
|                                         |                              |                   |                                             |                                                                                                                     |                                                          | Anti-inflammatory: inhibit NF-κB.                                |                            |  |
| <b>Potentilla erecta</b> (L.) Raeusch.  | Electu-arium Di-ascord. (48) | Hypogeal parts    | 48: [32,33]                                 | Antibacterial, Disinfectant (wounds)<br>Antipyretic<br>Antiviral                                                    | Antimicrobial: [226]                                     |                                                                  |                            |  |
| <i>Tormentilla, tormentil</i>           |                              |                   |                                             | Diaphoretic<br>Antihistamine                                                                                        |                                                          |                                                                  |                            |  |
| <b>Prunus domestica</b> L.              | Con-serva Hamech . (14)      | Scorza, balsamo   | [9]                                         | Skin diseases: Scabies (parasiticide), scall, itch, and irritations<br>Scurvy<br>Syphilis (cutaneous symptoms only) | Antihistamine: [227]                                     |                                                                  |                            |  |
|                                         | Un-guentum Pectorale (15)    |                   |                                             | Antidiarrhoeal<br>Anti-inflammatory<br>Carminative                                                                  |                                                          |                                                                  |                            |  |
| <b>Prunus dulcis</b> (Miller) D.A. Webb | Un-guentum ar-tanita (24)    | <u>Seeds, oil</u> | 15: [13]<br>24: [20]<br>30, 45, 54, 80: [9] | Stomach depu-rative<br>Diuretic<br>Emmenagogue                                                                      | Anti-inflamma-tory: [228] - <u>seeds</u><br><u>skins</u> | Anti-inflam-matory: inhibits IL-17, upregulating IFN-α and IL-4. | Anti-in-flamma-tory: [228] |  |
| <i>Man-dorlo dolce, sweet almond</i>    | Syrupus d. Pomis. s. (30)    |                   | 106: [53,285,286]                           | Emollient<br>Expectorant                                                                                            | Emollient: [229] - <u>Leaves</u> [230]                   |                                                                  |                            |  |
|                                         | Tro-chiscus d. Cap-par. (45) |                   |                                             | Laxative<br>Tuberculosis (ointment)                                                                                 |                                                          |                                                                  |                            |  |
|                                         | Electu-arium d.              |                   |                                             | Vermifuge                                                                                                           |                                                          |                                                                  |                            |  |



|                                                                            |                                                                                                                                                                                                                                                                              |                      |                                                                                                                                                                   |                                                                                                                                                                                                                                                                                                                                                          |                                                                                                                               |                                                                                         |                                    |
|----------------------------------------------------------------------------|------------------------------------------------------------------------------------------------------------------------------------------------------------------------------------------------------------------------------------------------------------------------------|----------------------|-------------------------------------------------------------------------------------------------------------------------------------------------------------------|----------------------------------------------------------------------------------------------------------------------------------------------------------------------------------------------------------------------------------------------------------------------------------------------------------------------------------------------------------|-------------------------------------------------------------------------------------------------------------------------------|-----------------------------------------------------------------------------------------|------------------------------------|
|                                                                            | Bac.<br>laur.<br>(54,80)                                                                                                                                                                                                                                                     |                      |                                                                                                                                                                   |                                                                                                                                                                                                                                                                                                                                                          |                                                                                                                               |                                                                                         |                                    |
|                                                                            | Oleum<br>Ami-<br>gda.<br>dul.<br>(106)                                                                                                                                                                                                                                       |                      |                                                                                                                                                                   |                                                                                                                                                                                                                                                                                                                                                          |                                                                                                                               |                                                                                         |                                    |
| <i>Prunus<br/>persica</i><br>(L.)<br>Batsch<br><br><i>Pesca,<br/>peach</i> | Syrupus<br>Flor.<br>Pers.<br>(110)<br><br>Aqua<br>Gland.<br>persic.<br>(142)                                                                                                                                                                                                 | Flowers<br><br>Seeds | 110:<br>[14,55,285,<br>286]<br><br>142:<br>[10,11]                                                                                                                | Carminative<br><br>Choleretic<br><br>Laxative<br><br>Myorelaxant<br><br>Vermifuge                                                                                                                                                                                                                                                                        | Laxative: [231]<br><br><br><br><br><br><br>Laxative: [231]                                                                    | Laxative: cal-<br>cium channels<br>blockage.                                            | Laxative:<br>[231]                 |
|                                                                            |                                                                                                                                                                                                                                                                              |                      |                                                                                                                                                                   |                                                                                                                                                                                                                                                                                                                                                          |                                                                                                                               |                                                                                         |                                    |
|                                                                            |                                                                                                                                                                                                                                                                              |                      |                                                                                                                                                                   |                                                                                                                                                                                                                                                                                                                                                          |                                                                                                                               |                                                                                         |                                    |
|                                                                            |                                                                                                                                                                                                                                                                              |                      |                                                                                                                                                                   |                                                                                                                                                                                                                                                                                                                                                          |                                                                                                                               |                                                                                         |                                    |
| <i>Rosa<br/>spp.</i><br><br><i>Rosa,<br/>rose</i>                          | Un-<br>guen-<br>tum<br>Lapatÿ<br>(6)<br><br>Un-<br>guen-<br>tum<br>Rosati<br>(10)<br><br>Tro-<br>chiscus<br>Absÿn-<br>thi (11)<br><br>Con-<br>serva<br>Hamech<br>. (14)<br><br>Electu-<br>arium<br>bened.<br>lax. (19)<br><br>Syrupus<br>rosatum<br>cum fu-<br>maria<br>(28) | Flowers              | 6, 10, 76,<br>93, 100,<br>115:<br>[10,11]<br><br>11, 14, 50,<br>84, 143: [9]<br><br>19: [16]<br><br>28, 105: [8]<br><br>35: [27]<br><br>86: [44]<br><br>119: [58] | Antibacterial,<br>Disinfectant<br><br>Antifungal<br><br>Anti-inflamma-<br>tory<br><br>Antipyretic<br><br>Antiviral (her-<br>pes)<br><br>Aperitive, diges-<br>tive<br><br>Wound healing<br><br>Choleretic<br><br>Liver depurative<br><br>Stomach depu-<br>rative<br><br>Diaphoretic<br><br>Diuretic<br><br>Emmenagogue<br><br>Expectorant<br><br>Jaundice | Antibacterial:<br>[238,239,242]<br><br>Anti-inflamma-<br>tory: [241,242]<br><br>Laxative:<br>[240]<br><br>Antiviral:<br>[242] | Anti-inflam-<br>matory: free<br>radicals scav-<br>enger, lowers<br>superoxide<br>anion. | Anti-in-<br>flamma-<br>tory: [242] |

---

|                                                      |                                                                               |
|------------------------------------------------------|-------------------------------------------------------------------------------|
| Syrupus<br>heder.<br>terres.<br>(35)                 | Laxative<br><br>Stomach-ache                                                  |
| Di-<br>atrium.<br>santal.<br>(50)                    | Skin diseases:<br>scabies (parasiti-<br>cide), scall, itch,<br>and irritation |
| Un-<br>guen-<br>tum<br>Lapat.<br>(76)                | Scurvy<br><br>Syphilis (cutane-<br>ous symptoms<br>only)                      |
| Con-<br>serva<br>Rosar.<br>(84)                      | Tonic                                                                         |
| Pilulae<br>Mas-<br>ticin.<br>(86)                    |                                                                               |
| Mel.<br>Ros. sol.<br>com.<br>(93)                    |                                                                               |
| Syrupus<br>roxato<br>(100)                           |                                                                               |
| Syr-<br>upus<br>rosatum<br>cum fu-<br>maria<br>(105) |                                                                               |
| Syrupus<br>ex. Trib.<br>infus.<br>(115)              |                                                                               |
| Mel.<br>Ros.<br>simp.<br>(119)                       |                                                                               |

---

|                                                                                                         |                                                                                           |                              |                        |                                                                                                                                                                                |                                                               |                                                                                                                                                                                                                      |                                             |
|---------------------------------------------------------------------------------------------------------|-------------------------------------------------------------------------------------------|------------------------------|------------------------|--------------------------------------------------------------------------------------------------------------------------------------------------------------------------------|---------------------------------------------------------------|----------------------------------------------------------------------------------------------------------------------------------------------------------------------------------------------------------------------|---------------------------------------------|
|                                                                                                         | Aqua<br>Pulmon.<br>(143)                                                                  |                              |                        |                                                                                                                                                                                |                                                               |                                                                                                                                                                                                                      |                                             |
| <i>Rubus<br/>ulmifolius</i><br>Schott<br><br><i>Mora,<br/>elm-leaf<br/>black-<br/>berry</i>             | Syrupus<br>Diamor.<br>(111)                                                               | Fruit                        | [13]                   | Anti-inflamma-<br>tory                                                                                                                                                         | Anti-inflamma-<br>tory: [246]                                 | Anti-inflam-<br>matory: inhib-<br>its COX-2<br>gene expres-<br>sion.                                                                                                                                                 | Anti-in-<br>flamma-<br>tory: [246]          |
| <i>San-<br/>guisorb<br/>a offic-<br/>nalis</i> L.<br><br><i>San-<br/>guisorba,<br/>great<br/>burnet</i> | Aqua<br>Pulmon.<br>(143)                                                                  | Buds                         | [9]                    | Circulatory sys-<br>tem                                                                                                                                                        | Circulatory sys-<br>tem: [262]                                | Circulatory<br>system:<br>Saponins: im-<br>prove hema-<br>topoiesis by<br>promoting<br>survival<br>through FAK<br>and Erk1/2 ac-<br>tivation and<br>modulating<br>cytokine<br>production in<br>the bone mar-<br>row. | Circulatory<br>system:<br>[262]             |
| <b>Rubiaceae</b>                                                                                        |                                                                                           |                              |                        |                                                                                                                                                                                |                                                               |                                                                                                                                                                                                                      |                                             |
| Emmenagogue                                                                                             |                                                                                           |                              |                        |                                                                                                                                                                                |                                                               |                                                                                                                                                                                                                      |                                             |
| <i>Rubia<br/>tinctorum</i> L.<br><br><i>Robbia<br/>comune,<br/>madder</i>                               | Electu-<br>arium<br>Diacur-<br>cumae<br>(9)<br><br>Tro-<br>chiscus<br>de<br>Mirra<br>(51) | Hypogeal<br>parts<br>Flowers | 9: [12]<br><br>51: [9] | Facilitates birth<br>(increases the<br>contractions)<br><br>Airways (non-<br>specified)<br><br>Gastrointestinal<br>disorders (non-<br>specified)<br><br>Menopausal<br>flushing | Gastrointestinal<br>disorders (Anti-<br>diarrhoeal):<br>[245] | Gastrointesti-<br>nal disorders:<br>possibly anti-<br>spasmodic ef-<br>fect, with re-<br>duction of in-<br>testinal con-<br>tractions, al-<br>lowing more<br>time for water<br>absorption.                           | Gastrointes-<br>tinal disor-<br>ders: [245] |
| Thermogenic                                                                                             |                                                                                           |                              |                        |                                                                                                                                                                                |                                                               |                                                                                                                                                                                                                      |                                             |
| <b>Rutaceae</b>                                                                                         |                                                                                           |                              |                        |                                                                                                                                                                                |                                                               |                                                                                                                                                                                                                      |                                             |
| <i>Citrus<br/>limon</i><br>(L.) Os-<br>beck                                                             | Syrupus<br>de s.<br>Citri.<br>(108)                                                       | Fruit, ep-<br>icarpo         | 108: [44]              |                                                                                                                                                                                |                                                               |                                                                                                                                                                                                                      |                                             |

|                                  |                                     |                     |                                              |                                                                |                                                                         |                                                                                                     |                            |
|----------------------------------|-------------------------------------|---------------------|----------------------------------------------|----------------------------------------------------------------|-------------------------------------------------------------------------|-----------------------------------------------------------------------------------------------------|----------------------------|
| <i>Limone, lemon</i>             | Syrupus de Suc. cit. (149)          |                     |                                              |                                                                |                                                                         |                                                                                                     |                            |
| <i>Citrus medica</i> L.          | Un-guentum Citrini. (44)            | Fruit               | 44: [30,285,286]                             | Antibacterial<br>Skin blemishes (scars, freckels, irritations) | Antibacterial: [131]                                                    |                                                                                                     |                            |
| <i>Cedro, citron</i>             | Aqua. Tot. citri. (135)             |                     | 135: [77,285,286]                            | Spasmolytic                                                    |                                                                         |                                                                                                     |                            |
|                                  | Tro-chiscus d. Cap-par. (45)        |                     |                                              | Analgesic<br>Antibacterial, Disinfectant (wounds)              |                                                                         |                                                                                                     |                            |
|                                  | Electu-arium Di-ascord. (48)        |                     |                                              | Anti-inflamma-tory                                             |                                                                         |                                                                                                     |                            |
| <i>Ruta graveo-lens</i> L.       | Electu-arium d. Bac. laur. (54, 80) | Leaves              | 45, 54,80: [9]<br>48: [32,33]<br>96: [13,19] | Aperitive, diges-tive<br>Carminative                           | Antibacterial: [250]<br>Antiinflammato-rio: [249]                       |                                                                                                     |                            |
| <i>Ruta, strong smelling rue</i> | Syrupus d. Arte-misie q.p. (96)     |                     | 102: [50,285,286]                            | Cephalea<br>Blood depura-tive                                  | Antipyretic: [249]                                                      |                                                                                                     |                            |
|                                  | Oleum de. Ru-tha. (102)             |                     | 124: [68,285]                                | Diaphoretic<br>Diuretic<br>Emmenagogue                         |                                                                         |                                                                                                     |                            |
|                                  | Aqua Ruth. orten. (124)             |                     |                                              | Reinforces nerv-ous system<br>Spasmolytic                      |                                                                         |                                                                                                     |                            |
| <b>Santalaceae</b>               |                                     |                     |                                              |                                                                |                                                                         |                                                                                                     |                            |
| <i>Santa-lum al-bum</i> L.       | Di-a-trium. santal. (50)            | Legno, senza scorza | 50: [285,286]                                | Antibacterial, disinfectant, as-tringent (wounds)              | Antibacterial: [263]<br>Anti-inflamma-tory (neuro-in-flammation): [264] | Anti-inflam-matory (neuro-in-flammation): increases ex-pression of IFN- $\beta$ and IFN- $\alpha$ . | Anti-in-flamma-tory: [264] |
| <i>Sandalo, sandal-wood</i>      | Em-plastru m                        |                     | 50, 78: [9]                                  | Anti-inflamma-tory                                             |                                                                         |                                                                                                     |                            |

|                                                     |                                           |         |                    |                                                          |                               |                                                                                                                         |
|-----------------------------------------------------|-------------------------------------------|---------|--------------------|----------------------------------------------------------|-------------------------------|-------------------------------------------------------------------------------------------------------------------------|
|                                                     | crustae<br>panis m.<br>(78)               |         |                    | Circulatory sys-<br>tem<br><br>Tonic                     |                               | Reduces ex-<br>pression of IL-<br>6, CXCL8,<br>CCL2, and IP-<br>10. Causes<br>over-expres-<br>sion of TLR2<br>and TLR4. |
| <b>Saxifragaceae</b>                                |                                           |         |                    |                                                          |                               |                                                                                                                         |
| <i>Saxi-<br/>fraga<br/>spp</i>                      | Electu-<br>arium<br>bened.<br>lax. (19)   | Seeds   | [16]               | Laxative                                                 |                               |                                                                                                                         |
| <i>Sas-<br/>sifraga,<br/>saxifrage</i>              |                                           |         |                    |                                                          |                               |                                                                                                                         |
| <b>Solanaceae</b>                                   |                                           |         |                    |                                                          |                               |                                                                                                                         |
| <i>Hyoscy-<br/>amus<br/>niger L.</i>                | Pilulae<br>de Cino-<br>glo. (69)          | Seeds   | [9]                | Astringent for<br>gums<br><br>Expectorant                |                               |                                                                                                                         |
| <i>Giusquia<br/>mo, hen-<br/>bane</i>               |                                           |         |                    | Sedative-hyp-<br>notic                                   |                               |                                                                                                                         |
| <b>Tamaricaceae</b>                                 |                                           |         |                    |                                                          |                               |                                                                                                                         |
| <i>Tamarix<br/>gallica<br/>L.</i>                   | Un-<br>guen-<br>tum ar-<br>tanita<br>(24) | Fruit   | [20]               | Anti-inflamma-<br>tory<br><br>Tuberculosis<br>(ointment) |                               |                                                                                                                         |
| <i>Tamerice<br/>comune,<br/>French<br/>tamarisk</i> |                                           |         |                    |                                                          |                               |                                                                                                                         |
| <b>Thymelaeaceae</b>                                |                                           |         |                    |                                                          |                               |                                                                                                                         |
| <i>Daphne<br/>meze-<br/>reum L.</i>                 | Un-<br>guen-<br>tum ar-<br>tanita<br>(24) | Scorza  | [20]               | Stomach depu-<br>rative<br><br>Laxative<br><br>Vermifuge |                               |                                                                                                                         |
| <i>Dafne<br/>mezereo,<br/>February<br/>daphne</i>   |                                           |         |                    |                                                          |                               |                                                                                                                         |
| <b>Violaceae</b>                                    |                                           |         |                    |                                                          |                               |                                                                                                                         |
| <i>Viola<br/>tricolor<br/>L.</i>                    | Un-<br>guen-<br>tum<br>Lapatj<br>(6)      | Flowers | 6, 76:<br>[10,11]  | Antifungal<br><br>Anti-inflamma-<br>tory                 | Anti-inflamma-<br>tory: [279] |                                                                                                                         |
| <i>tricolor</i>                                     |                                           |         | 14, 50, 69:<br>[9] | Antiviral (her-<br>pes)                                  |                               |                                                                                                                         |
| <i>or</i>                                           | Con-<br>serva                             |         |                    |                                                          |                               |                                                                                                                         |

|                                   |                                                                  |                     |              |                                                                     |                          |
|-----------------------------------|------------------------------------------------------------------|---------------------|--------------|---------------------------------------------------------------------|--------------------------|
| <b>Viola spp.</b>                 | Hamech (14)                                                      |                     |              | Astringent for gums                                                 |                          |
| <i>Viola, violet</i>              | Diatrium. santal. (50)                                           |                     |              | Expectorant                                                         |                          |
|                                   | Pilulae de Cino-glo. (69)                                        |                     |              | Sedative-hypnotic                                                   |                          |
|                                   | Unguentum Lapat. (76)                                            |                     |              | Skin diseases: scabies (parasiticide), scall, Itch, and irritations |                          |
|                                   |                                                                  |                     |              | Scurvy                                                              |                          |
|                                   |                                                                  |                     |              | Syphilis (cutaneous symptoms only)                                  |                          |
|                                   |                                                                  |                     |              | Tonic                                                               |                          |
| <b>Vitaceae</b>                   |                                                                  |                     |              |                                                                     |                          |
|                                   | Il vino o l'aceto sono ingredienti di diversi preparati tra cui: |                     |              | Anti-inflammatory                                                   |                          |
|                                   |                                                                  |                     |              | Carminative                                                         |                          |
|                                   | Unguentum ar-tanita (24)                                         | Fruit, vino o aceto | 24: [20]     | Stomach depurative                                                  |                          |
| <b>Vitis vinifera L.</b>          |                                                                  |                     | 27: [22]     | Emetic                                                              |                          |
|                                   |                                                                  |                     | 29: [23]     | Expectorant, mucolytic                                              | Anti-inflammatory: [281] |
| <i>Vino, aceto, wine, vinegar</i> | Oxymel scyll. (27)                                               |                     | 117: [56,57] | Laxative                                                            |                          |
|                                   |                                                                  |                     | 142: [10,11] | Stomach-ache                                                        |                          |
|                                   | Oleum Spica. (29)                                                |                     |              | Tuberculosis (ointment)                                             |                          |
|                                   | Oxymel Simpl. (117)                                              |                     |              | Vermifuge                                                           |                          |
|                                   | Aqua Gland.                                                      |                     |              |                                                                     |                          |

|                                                  |                                             |                             |                   |                                                   |                                                               |                                                                                                                                                    |                               |
|--------------------------------------------------|---------------------------------------------|-----------------------------|-------------------|---------------------------------------------------|---------------------------------------------------------------|----------------------------------------------------------------------------------------------------------------------------------------------------|-------------------------------|
| persic.<br>(142)                                 |                                             |                             |                   |                                                   |                                                               |                                                                                                                                                    |                               |
| <b>Xanthorrhoeaceae</b>                          |                                             |                             |                   |                                                   |                                                               |                                                                                                                                                    |                               |
| <i>Aloe perryi</i><br>Baker                      | Pilulae<br>Mas-<br>ticin.<br>(86)           | Leaves,<br>juice            | 86: [44]          | Laxative                                          |                                                               |                                                                                                                                                    |                               |
| <i>Aloe socotrina</i> ,<br><i>Socotrine aloe</i> |                                             |                             |                   |                                                   |                                                               |                                                                                                                                                    |                               |
|                                                  |                                             |                             |                   | Antibacterial,<br>disinfectant<br>(wounds)        |                                                               |                                                                                                                                                    |                               |
|                                                  | Un-<br>guen-<br>tum ar-<br>tanita<br>(24)   |                             | 24: [20]          | Depurative                                        | Antibacterial:<br>[96]                                        |                                                                                                                                                    |                               |
| <i>Aloe spp.</i>                                 |                                             |                             |                   | Emmenagogue                                       | Laxative<br>(Emodin): [98]                                    |                                                                                                                                                    |                               |
| <i>Aloe, aloe</i>                                | Pilulae<br>Aloe.<br>lota. (62)              | Leaves,<br>juice e gel      | 62:<br>[10,11,19] | Expectorant,<br>Respiratory tract                 | Respiratory tract<br>prophylaxis:<br>[94]                     | Laxative:<br>Emodin: in-<br>creases ex-<br>pression of<br>aquaporin 3.                                                                             | Laxative:<br>[98]             |
|                                                  |                                             |                             | 81: [42]          | Laxative                                          |                                                               |                                                                                                                                                    |                               |
|                                                  | Pilulae<br>de<br>Amon.<br>q. (81)           |                             |                   | Scabies (Parasit-<br>icide)                       | Vermifuge (An-<br>thelmintic): [97]                           |                                                                                                                                                    |                               |
|                                                  |                                             |                             |                   | Stomach depu-<br>rative                           | Wound healing:<br>[95]                                        |                                                                                                                                                    |                               |
| <b>Zingiberaceae</b>                             |                                             |                             |                   |                                                   |                                                               |                                                                                                                                                    |                               |
| <i>Alpinia galanga</i><br>(L.)<br>Willd.         | Electu-<br>arium<br>bened.<br>lax. (19)     | Hypogeal<br>parts           | [16]              | Laxative                                          |                                                               |                                                                                                                                                    |                               |
| <i>Galanga</i> ,<br><i>Siamese ginger</i>        |                                             |                             |                   |                                                   |                                                               |                                                                                                                                                    |                               |
|                                                  |                                             |                             |                   | Airways (non-<br>specified)                       |                                                               | Airways<br>(asthma)                                                                                                                                |                               |
| <i>Curcuma longa</i> L.                          | Electu-<br>arium<br>Diacur-<br>cumae<br>(9) | Hypogeal<br>parts<br>Leaves | [12]              | Gastrointestinal<br>disorders (non-<br>specified) | Airways:<br>[148,149]<br>Gastrointestinal<br>disorders: [149] | Curcumin:<br>regulates<br>transcription<br>factors as NF-<br>kB, cytokines<br>(IL6 and TNF-<br>$\alpha$ ), adhesion<br>molecules as<br>ICAM-1, and | Airways<br>(asthma):<br>[148] |
| <i>Curcuma</i> ,<br><i>turmeric</i>              |                                             |                             |                   | Myorelaxant                                       |                                                               |                                                                                                                                                    |                               |
|                                                  |                                             |                             |                   | Thermogenic                                       |                                                               |                                                                                                                                                    |                               |

|                                        |                                                                                         |                   |                                           |                                                                                                                        |                                                                                                                                                                     |                                                                                                                                                                                           |                                                                                                                                                 |
|----------------------------------------|-----------------------------------------------------------------------------------------|-------------------|-------------------------------------------|------------------------------------------------------------------------------------------------------------------------|---------------------------------------------------------------------------------------------------------------------------------------------------------------------|-------------------------------------------------------------------------------------------------------------------------------------------------------------------------------------------|-------------------------------------------------------------------------------------------------------------------------------------------------|
|                                        |                                                                                         |                   |                                           |                                                                                                                        |                                                                                                                                                                     |                                                                                                                                                                                           | enzymes (MMPs)<br>Inhibiting NF-kB activity reduces AHR and inflammatory cell airway infiltration and determines IgE levels attenuation in BALF |
| <i>Elettaria cardamomum</i> (L.) Maton | Electu-<br>arium<br>bened.<br>lax. (19)                                                 | Seeds             | [16]                                      | Laxative                                                                                                               |                                                                                                                                                                     |                                                                                                                                                                                           |                                                                                                                                                 |
| <i>Cardamomo, green cardamom</i>       |                                                                                         |                   |                                           |                                                                                                                        |                                                                                                                                                                     |                                                                                                                                                                                           |                                                                                                                                                 |
| <i>Zingiber officinale</i> Roscoe      | Tro-<br>chiscus<br>de<br>Agarici<br>(17)<br><br>Electu-<br>arium<br>bened.<br>lax. (19) | Hypogeal<br>parts | 17:<br>[10,11,14]<br>19: [16]<br>24: [20] | Gastric acidity<br><br>Stomach depu-<br>rative<br><br>Expectorant<br><br>Laxative<br><br>Stomach-ache<br><br>Vermifuge | Gastric acidity:<br>[284]<br><br>Stomach depu-<br>rative and stom-<br>ach-ache (gas-<br>troprotective ef-<br>fect): [283]<br><br>Vermifuge/An-<br>thelmintic: [282] | Gastric acid-<br>ity:<br>Phenolic com-<br>pounds: anti-<br>oxidant activ-<br>ity, inhibits<br>gastric acid,<br>K <sup>+</sup> -ATPase,<br>and <i>Helicobac-<br/>ter pylori</i><br>growth. | Gastric<br>acidity:<br>[284]                                                                                                                    |
| <i>Zenzero, ginger</i>                 | Un-<br>guen-<br>tum ar-<br>tanita<br>(24)                                               |                   |                                           |                                                                                                                        |                                                                                                                                                                     |                                                                                                                                                                                           |                                                                                                                                                 |

**Key:** **Green:** the **highlighted article** cites polar extracts and preparations (water, EtOH, MeOH); **Underlined:** the **underlined article** cites plant parts different from the ones in the historical source; **Red:** the species showed in scientific literature an **activity** opposite to that in the historical source.
